# Supplementary material for: [Ru(η6-p-cymene)(N^O 8-hydroxyquinoline)(PTA)] complexes as rising stars in medicinal chemistry: synthesis, properties, biomolecular interactions,in vitroanti-tumor activity toward human brain carcinomas, andin vivobiodistribution and toxicity in a zebrafish model
Source: Royal Society of Chemistry journal article supplement (doi:10.1039/d2dt00666a), 2022-01-01
Supplement: d2dt00666a1.pdf [file d2dt00666a1.pdf]

## Supporting Information

### **[Ru( $\eta^6$ -*p*-cymene)(N<sup>^</sup>O 8-hydroxy quinoline)(pta)] complex as a rising star in medicinal chemistry: synthesis, properties, biomolecular interaction, *in vitro* anti-tumor activity in human brain carcinomas and *in vivo* biodistribution and toxicity in zebrafish model †**

Anuja P K,<sup>[a]</sup> Nilmadhab Roy,<sup>[a]</sup> Utpal Das,<sup>[a]</sup> Seshu Varddhan,<sup>[b]</sup> Suban K. Sahoo,<sup>[b]</sup> Priyankar Paira\*<sup>[a]</sup>

---

<sup>[a]</sup>Department of Chemistry, School of advanced sciences, Vellore Institute of Technology Vellore-632014, Tamilnadu, India, E-mail: [priyankar.paira@vit.ac.in](mailto:priyankar.paira@vit.ac.in)

<sup>[b]</sup>Department of Applied Chemistry, S.V. National Institute of Technology (SVNIT) Ichchanath, Surat, Gujrat-395007, E-mail: [suban\\_sahoo@rediffmail.com](mailto:suban_sahoo@rediffmail.com)

---

**Table S1** Photophysical characterization, solubility, lipophilicity and conductivity study of RAPTA complexes

| Complexes        | $\lambda_{\text{max}}$ (nm) <sup>a</sup> | $\lambda_{\text{f}}$ (nm) <sup>b</sup> | Stoke's shift | O.D <sup>c</sup> | $\epsilon$ (M <sup>-1</sup> cm <sup>-1</sup> ) <sup>d</sup> | $(\phi_{\text{f}})$ <sup>e</sup> | Solubility (M) <sup>f</sup> | log P <sup>g</sup> | $\Lambda_{\text{M}}$ <sup>h</sup> (Scm <sup>2</sup> mol <sup>-1</sup> ) |          |
|------------------|------------------------------------------|----------------------------------------|---------------|------------------|-------------------------------------------------------------|----------------------------------|-----------------------------|--------------------|-------------------------------------------------------------------------|----------|
|                  |                                          |                                        |               |                  |                                                             |                                  |                             |                    | DMSO                                                                    | 10% DMSO |
| [RuL1P TA]       | 265, 300, 400                            | 375                                    | 110, 75       | 0.03             | 1000                                                        | 0.18                             | 0.041                       | 0.45±0.04          | 120                                                                     | 124      |
| [RuL2P TA]       | 270, 325, 425                            | 370                                    | 100, 45       | 0.03             | 1000                                                        | 0.08                             | 0.044                       | 0.69±0.05          | 127                                                                     | 128      |
| [RuL3P TA]       | 280, 350, 425                            | 380                                    | 100, 30       | 0.025            | 833                                                         | 0.45                             | 0.046                       | 0.87±0.03          | 131                                                                     | 134      |
| [RuL4P TA]       | 275, 350                                 | 375                                    | 100, 25       | 0.01             | 333                                                         | 0.27                             | 0.045                       | 1.1±0.01           | 130                                                                     | 132      |
| [RuL5P TA]       | 285, 340, 425                            | 380                                    | 95, 40        | 0.02             | 666                                                         | 0.48                             | 0.052                       | 0.94±0.07          | 136                                                                     | 138      |
| Cisplatin        | -                                        | -                                      | -             | -                | -                                                           | -                                | 0.019                       | -                  | 36                                                                      | 207      |
| Quinine Sulphate | 352                                      | 450                                    | 98            | 0.09             | 3000                                                        | 0.546                            | -                           | -                  | -                                                                       | -        |

<sup>a</sup>absorption maxima, <sup>b</sup>maximum emission wavelength ( $\lambda_{\text{exc}}$  325 nm), <sup>c</sup>optical density, <sup>d</sup>extinction coefficient, <sup>e</sup>quantum yield, <sup>f</sup>DMSO-10% DMEM medium (1:99 v/v, comparable to cell media), <sup>g</sup> Partition Coefficients in n-Octanol/Water, <sup>h</sup>conductance in DMSO and 10% DMSO ( $3 \times 10^{-5}$  M)

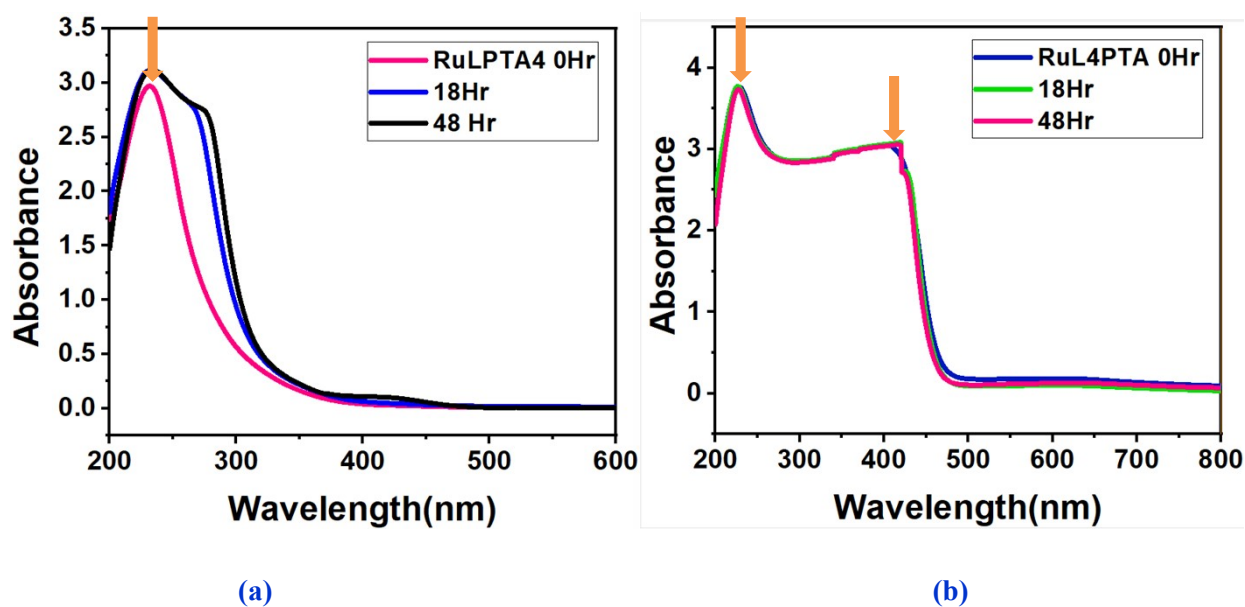

**Fig. S1** Stability study of selected complex [RuL4PTA] in (a) GSH (1 mM) (b) MTT Media

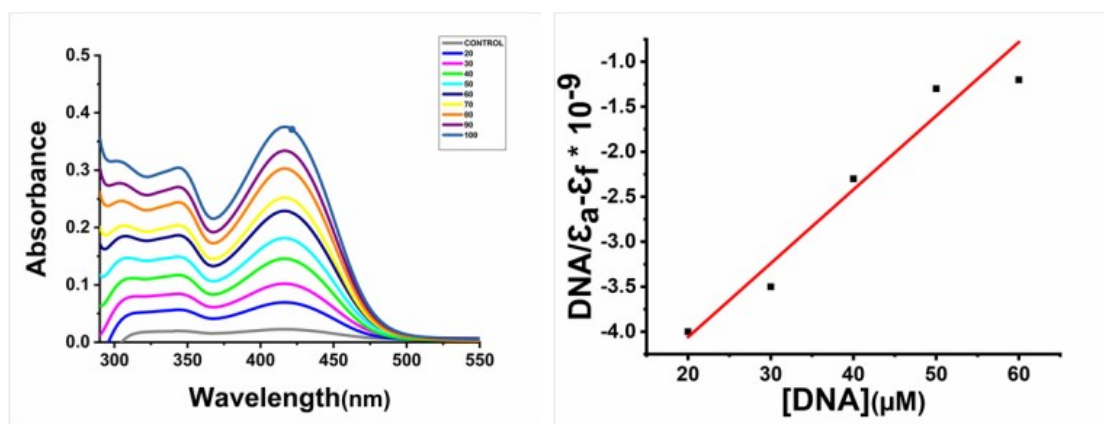

**Fig. S2** UV-Visible Spectral pattern of [RuL3PTA] in Tris-HCl-NaCl solution (5 mM) of pH=7.2 with increased concentration of Ct-DNA

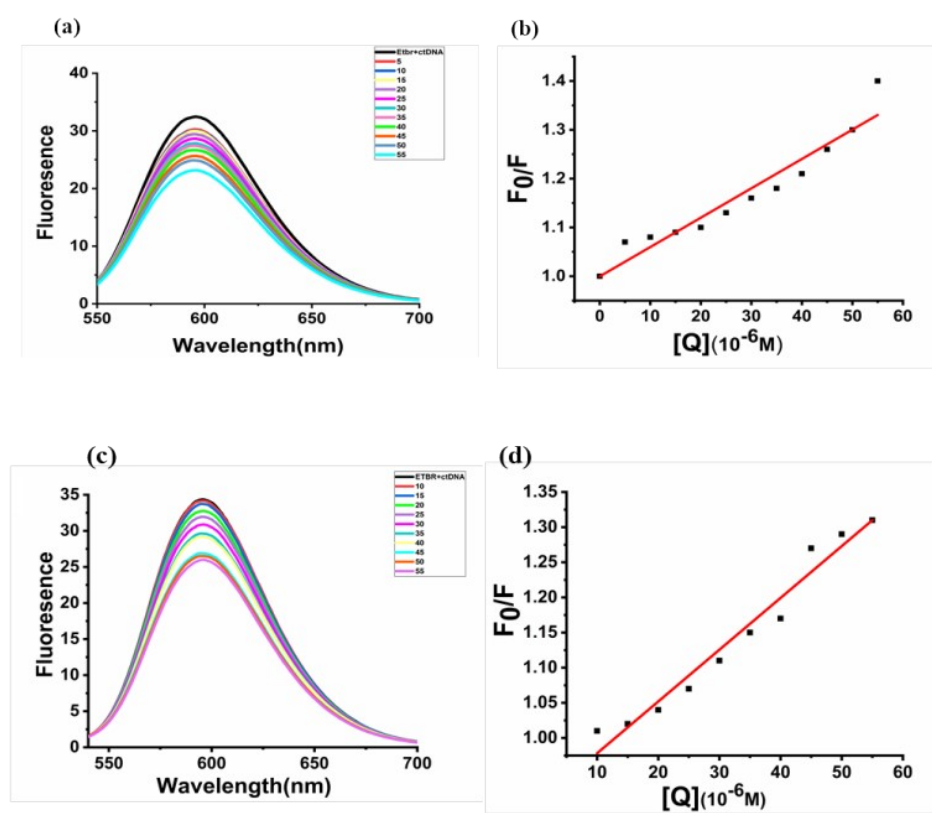

**Fig. S3** Fluorescence spectral responses of EtBr bound DNA in the Presence of complexes [RuL3PTA] and [RuL4PTA] in 5 mM Tris-HCl /NaCl buffer of pH 7.2

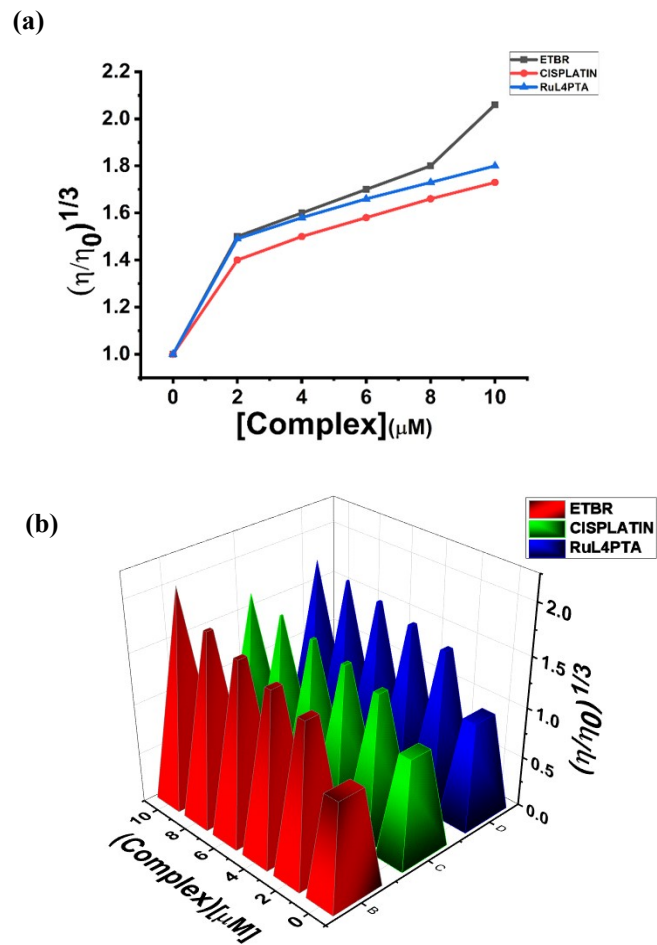

**Fig. S4** Effect of increasing amounts of complex, EtBr, and cisplatin on the Viscosity of Ct-DNA at 298 K ( $[\text{EtBr}] = 1 \times 10^{-6} \text{ mol/L}$ ;  $[\text{DNA}] = 1 \times 10^{-6} \text{ mol/L}$ ;  $[\text{ligand}] = 1 \times 10^{-3} \text{ mol/L}$ )

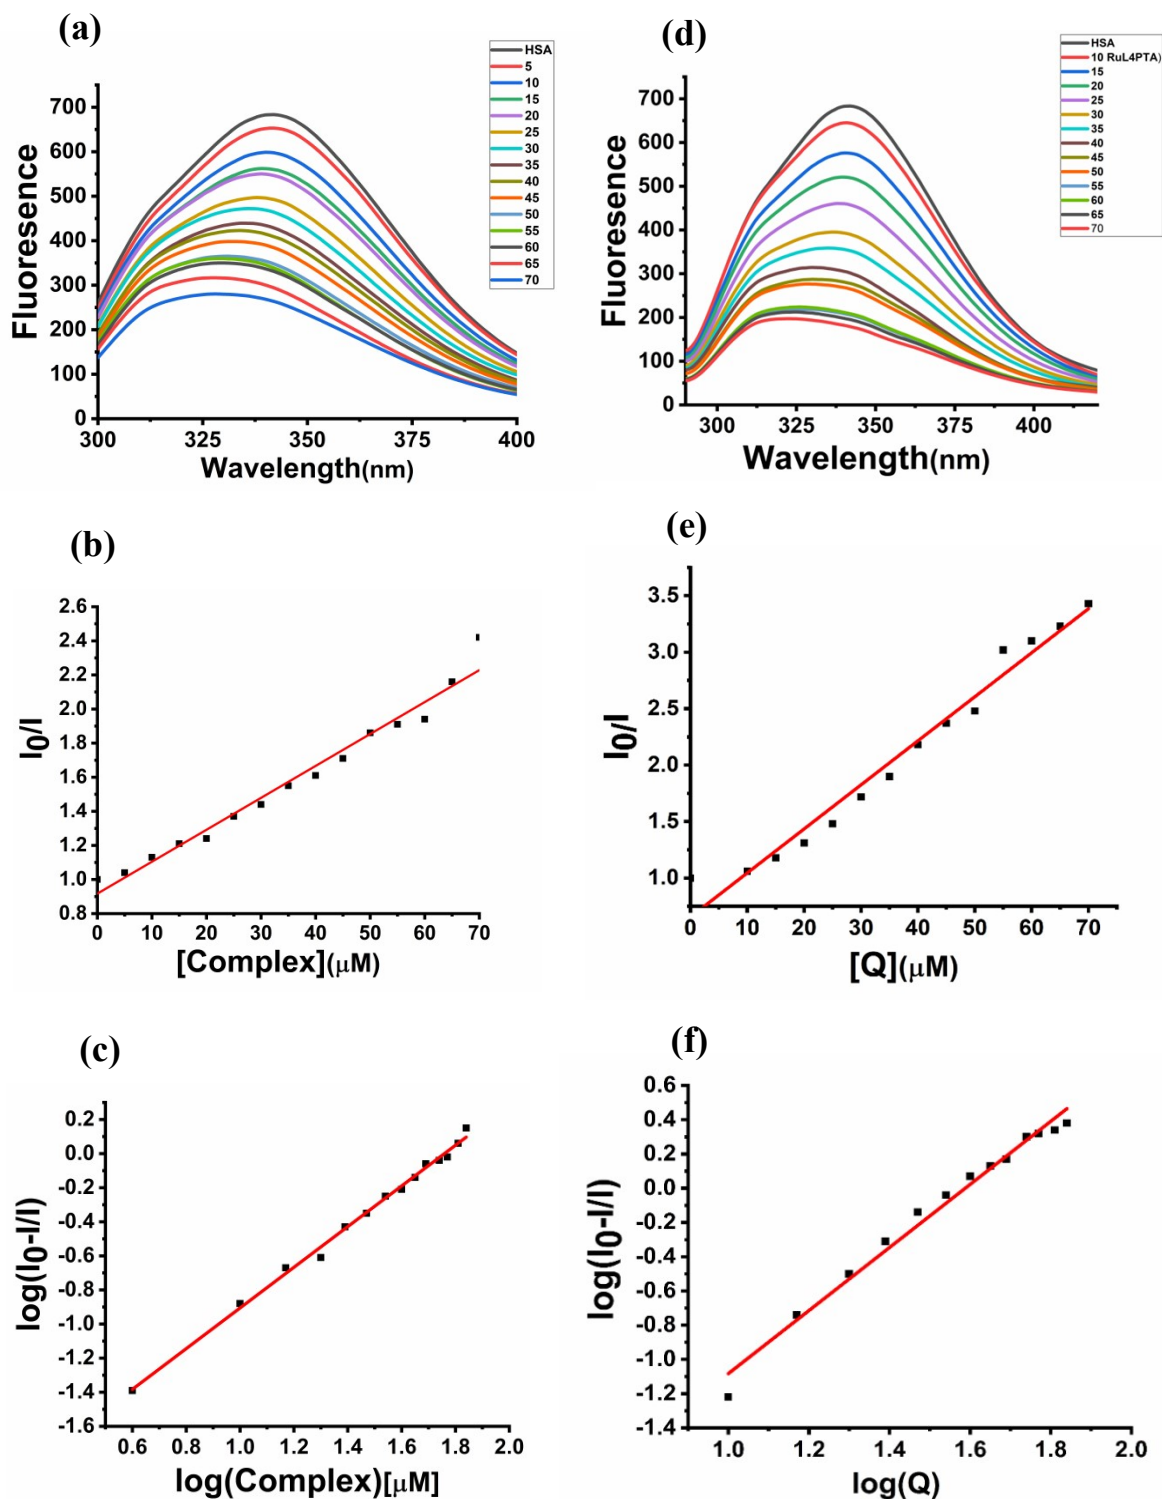

**Fig. S5** Fluorescence quenching of HSA on addition of complex (a) [RuL3PTA] (d) [RuL4PTA] in 5 mM TrisHCl/NaCl buffer at pH 7.2 at 298 K ( $\lambda_{ex} = 295$ ;  $\lambda_{em} = 350$  nm). Plot of  $F_0/F$  vs. concentrations of complex (b) [RuL3PTA] and (e) [RuL4PTA]. Scatchard plot of  $\log([F_0-F]/F)$  vs. (c)  $\log$  [RuL3PTA] and (f)  $\log$  [RuL4PTA]

**Table S2** Molecular docking estimated free energy of binding (kcal/mol) and the inhibition constant (K<sub>i</sub>) of the RAPTA complexes with the BSA and DNA.

| Free Energy of Binding (kcal/mole) |           |           |           |           |           |
|------------------------------------|-----------|-----------|-----------|-----------|-----------|
|                                    | [RuL1PTA] | [RuL2PTA] | [RuL3PTA] | [RuL4PTA] | [RuL5PTA] |
| BSA                                | -7.35     | -7.6      | -7.27     | -7.49     | -7.47     |
| DNA                                | -9.39     | -9.52     | -9.19     | -9.25     | -9.4      |

  

| Inhibition Constant (K <sub>i</sub> ) |           |           |           |           |           |
|---------------------------------------|-----------|-----------|-----------|-----------|-----------|
|                                       | [RuL1PTA] | [RuL2PTA] | [RuL3PTA] | [RuL4PTA] | [RuL5PTA] |
| BSA                                   | 4.10 μM   | 2.70 μM   | 4.69 μM   | 3.23 μM   | 3.34 μM   |
| DNA                                   | 130.66 nM | 104.58 nM | 182.21 nM | 164.73 nM | 129.31 nM |

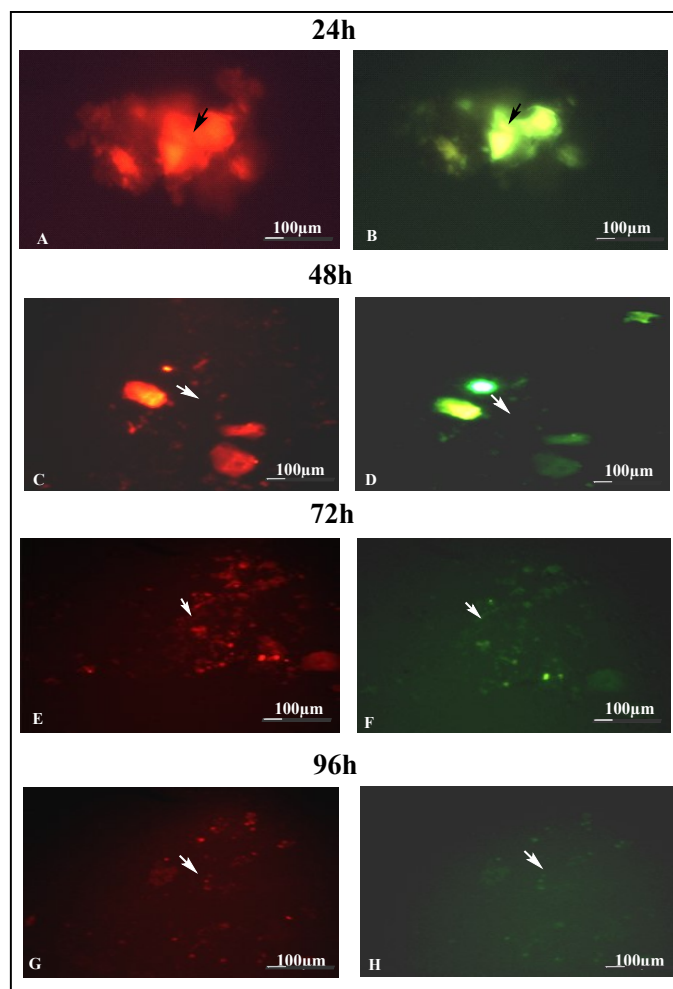

**Fig. S6** Post treatment analysis of neutrosphere *via* fluorescence imaging

# <sup>1</sup>H NMR of RuL1PTA

Signature SIF VIT VELLORE  
6A

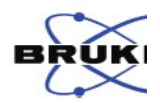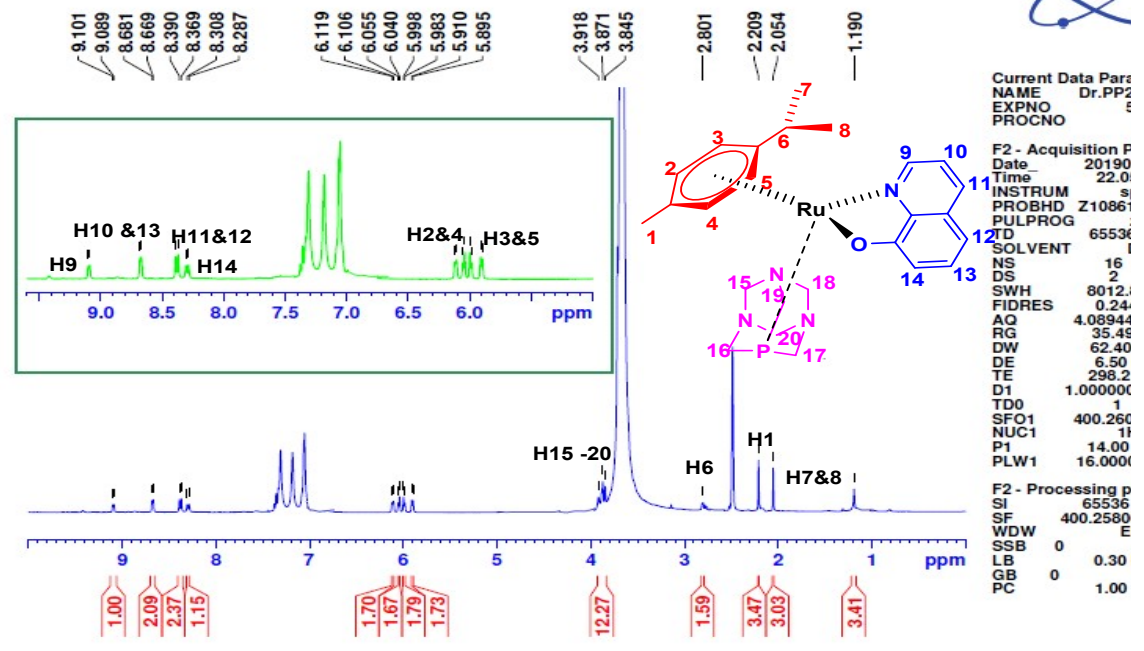

# <sup>13</sup>C NMR of RuL1PTA

Signature SIF VIT VELLORE  
6A

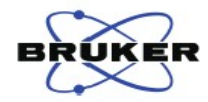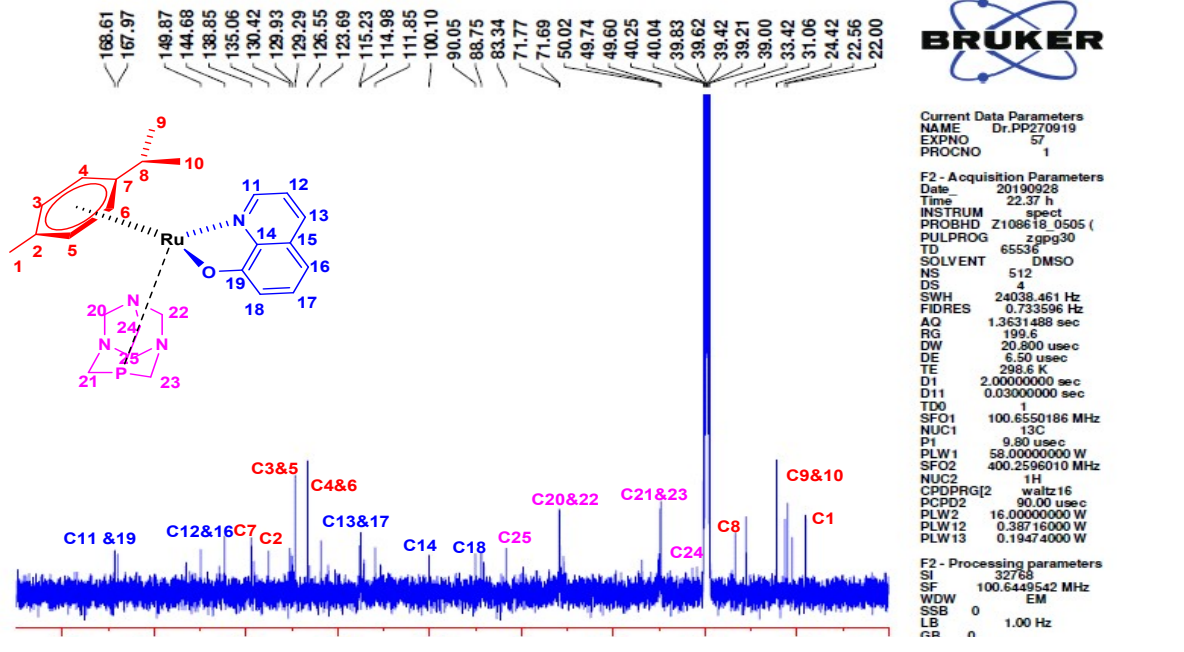

# <sup>31</sup>P NMR of RuL1PTA

Signature SIF VIT VELLORE  
6A

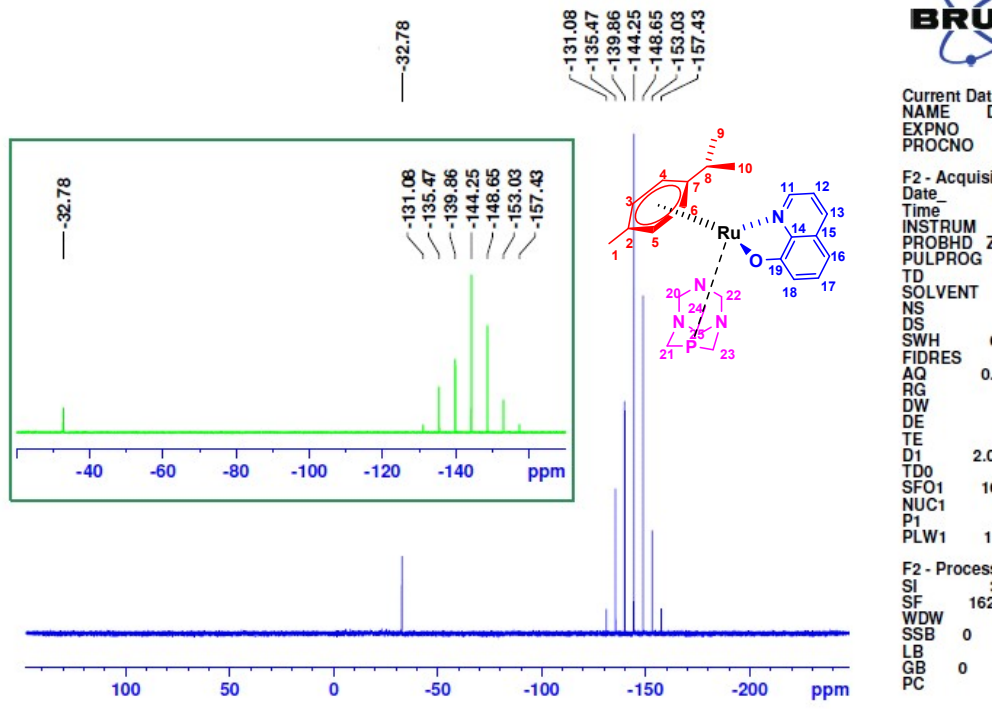

# <sup>19</sup>F NMR of RuL1PTA

Signature SIF VIT VELLORE  
6A

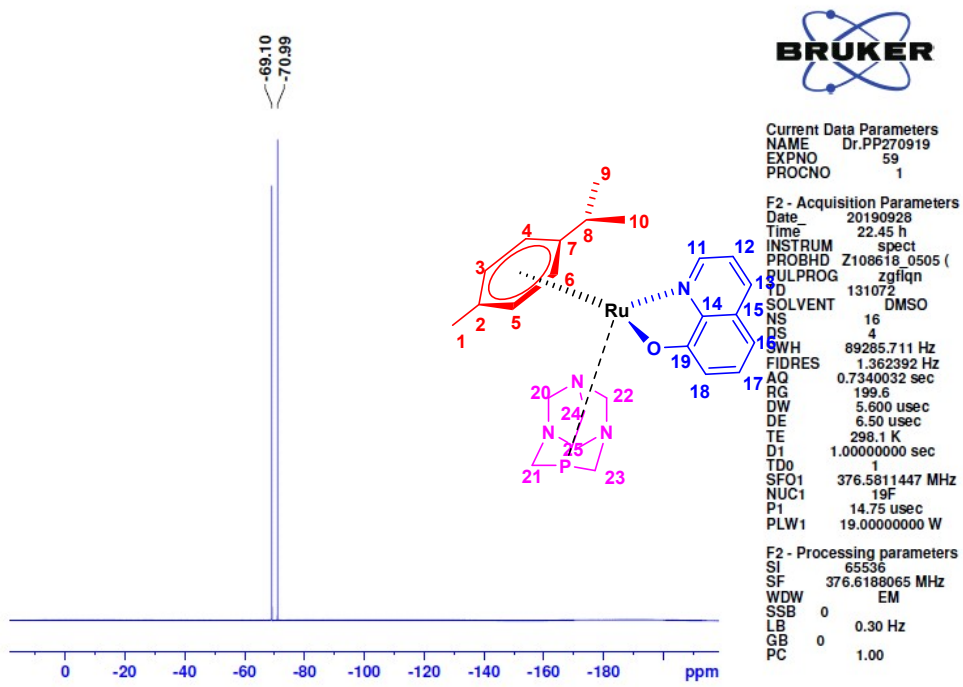



# <sup>1</sup>H NMR of RuL2PTA

Signature SIF VIT VELLORE  
6B

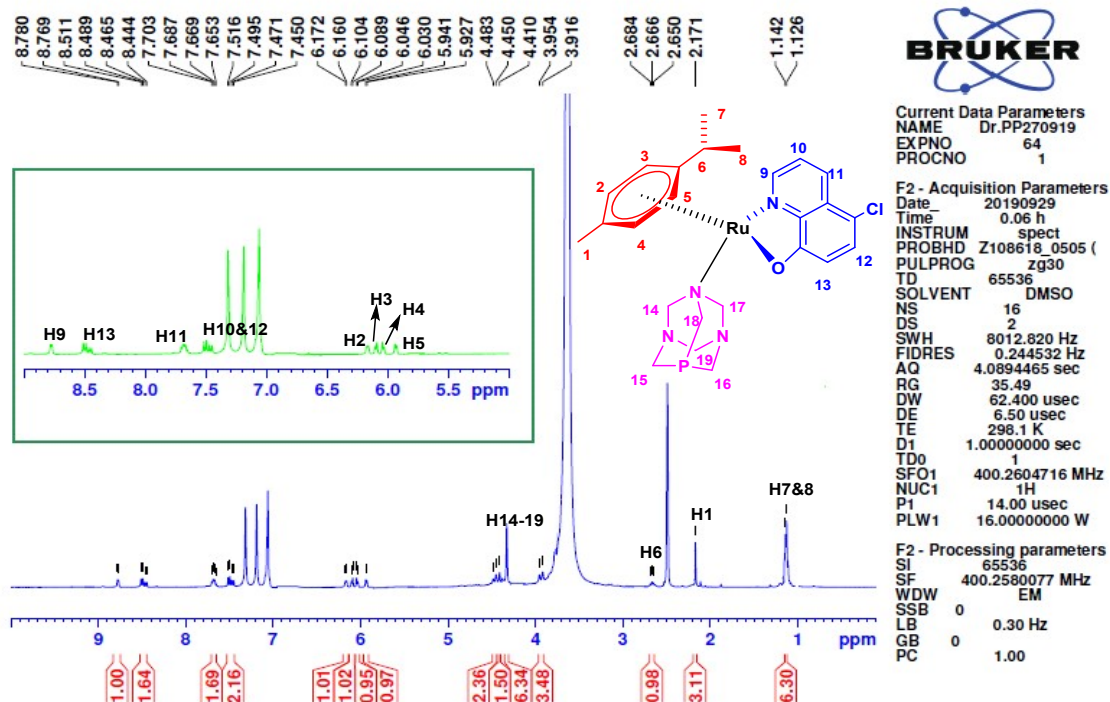

# <sup>13</sup>C NMR of RuL2PTA

Signature SIF VIT VELLORE  
6B

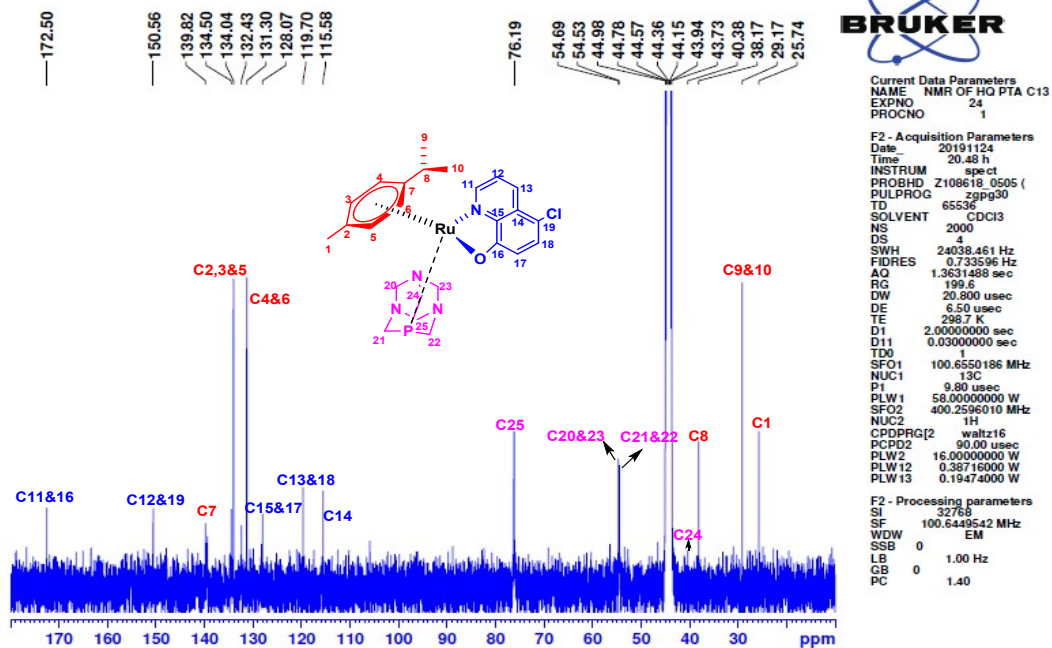

## <sup>19</sup>F NMR of RuL2PTA

Signature SIF VIT VELLORE  
6B

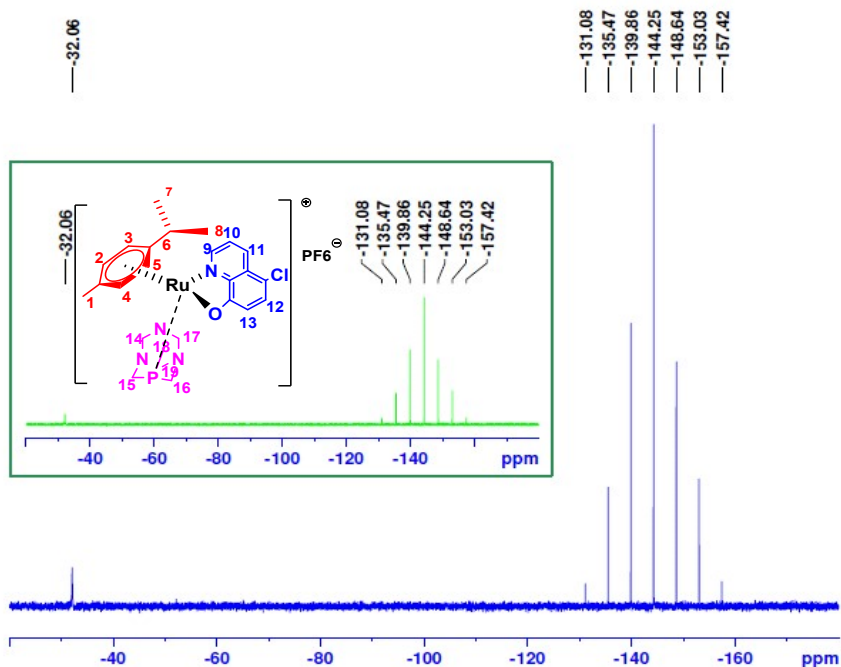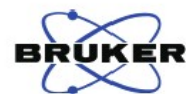

Current Data Parameters  
 NAME Dr.PP270919  
 EXPNO 66  
 PROCNO 1

F2 - Acquisition Parameters  
 Date\_ 20190929  
 Time 0.42 h  
 INSTRUM spect  
 PROBHD Z108618\_0505 ( )  
 PULPROG zg30  
 TD 65536  
 SOLVENT DMSO  
 NS 32  
 DS 4  
 SWH 64102.563 Hz  
 FIDRES 1.956255 Hz  
 AQ 0.511808 sec  
 RG 199.6  
 DW 7.800 usec  
 DE 6.50 usec  
 TE 298.0 K  
 D1 2.00000000 sec  
 TD0 1  
 SFO1 162.0193069 MHz  
 NUC1 <sup>31</sup>P  
 P1 13.75 usec  
 PLW1 15.00000000 W

F2 - Processing parameters  
 SI 32768  
 SF 162.0274083 MHz  
 WDW EM  
 SSB 0  
 LB 1.00 Hz  
 GB 0  
 PC 1.40

## <sup>31</sup>P NMR of RuL2PTA

Signature SIF VIT VELLORE  
6B

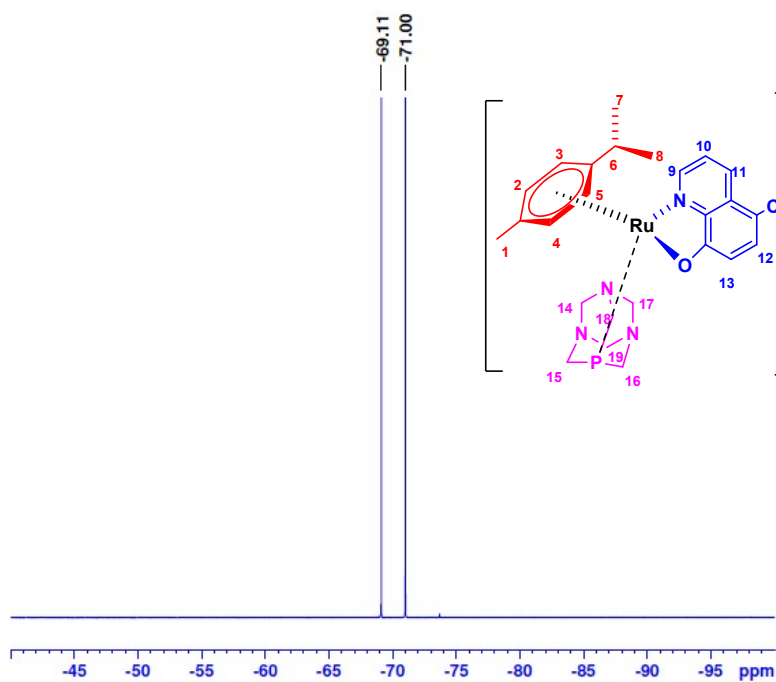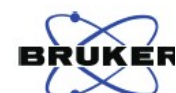

Current Data Parameters  
 NAME Dr.PP2709  
 EXPNO 67  
 PROCNO 1

F2 - Acquisition Parameters  
 Date\_ 20190929  
 Time 0.47 h  
 INSTRUM spect  
 PROBHD Z108618\_0505 ( )  
 PULPROG zgpg30  
 TD 131072  
 SOLVENT DMSO  
 NS 16  
 DS 4  
 SWH 89285.711 Hz  
 FIDRES 1.36239 Hz  
 AQ 0.7340032 sec  
 RG 199.6  
 DW 5.600 usec  
 DE 6.50 usec  
 TE 297.9 K  
 D1 1.00000000 sec  
 TD0 1  
 SFO1 376.581144 MHz  
 NUC1 <sup>31</sup>P  
 P1 14.75 usec  
 PLW1 19.00000000 W

F2 - Processing parameters  
 SI 65536  
 SF 376.6188065 MHz  
 WDW EM  
 SSB 0  
 LB 0.30 Hz  
 GB 0  
 PC 1.00

# <sup>1</sup>H NMR of RuL3PTA

Signature SIF VIT VELLORE  
6C

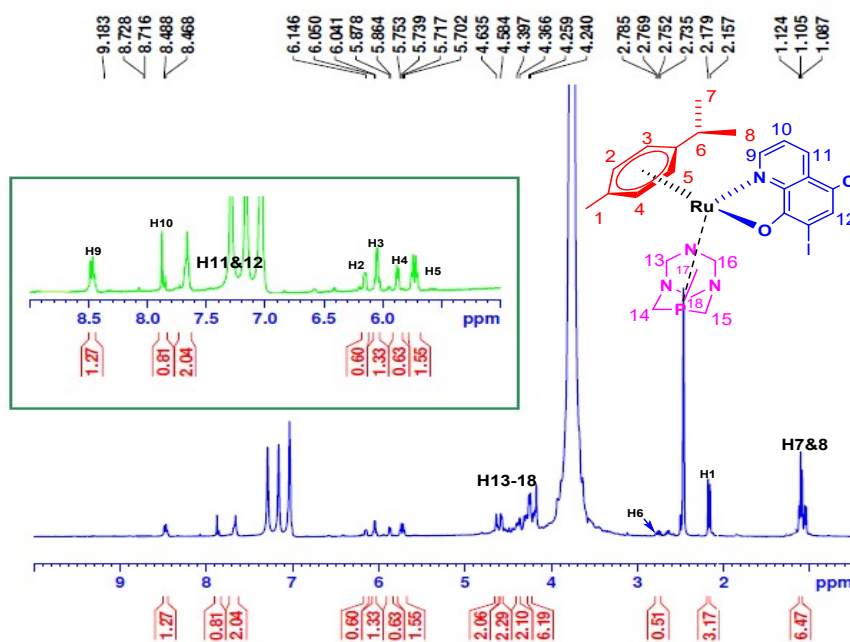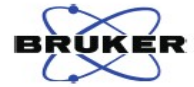

Current Data Parameters  
NAME Dr.PP270919  
EXPNO 52  
PROCNO 1

F2 - Acquisition Parameters  
Date 20190928  
Time 5.56 h  
INSTRUM spect  
PROBHD Z108618\_0505 ( )  
PULPROG zg30  
TD 65536  
SOLVENT DMSO  
NS 16  
DS 2  
SWH 8012.820 Hz  
FIDRES 0.244532 Hz  
AQ 4.0894465 sec  
RG 19.37  
DW 62.400 usec  
DE 6.50 usec  
TE 298.0 K  
D1 1.00000000 sec  
TD0  
SFO1 400.2604716 MHz  
NUC1 1H  
P1 14.00 usec  
PLW1 16.00000000 W

F2 - Processing parameters  
SI 65536  
SF 400.2580177 MHz  
WDW EM  
SSB 0  
LB 0.30 Hz  
GB 0  
PC 1.00

# <sup>13</sup>C NMR of RuL3PTA

Signature SIF VIT VELLORE  
6C

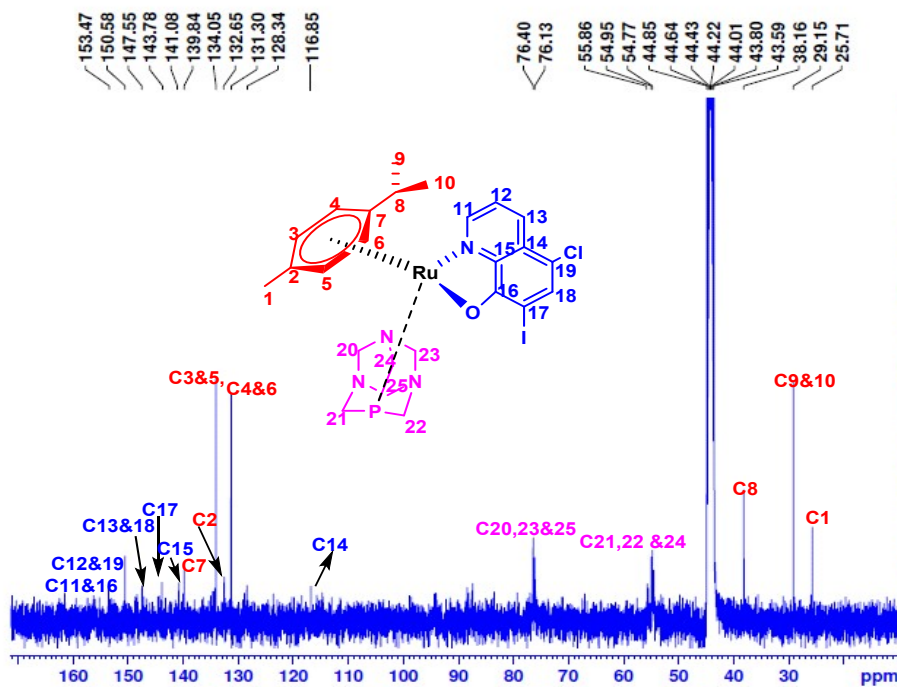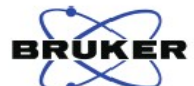

Current Data Parameters  
NAME NMR OF HQ PTA C13  
EXPNO 23  
PROCNO 1

F2 - Acquisition Parameters  
Date 20191124  
Time 18.50 h  
INSTRUM spect  
PROBHD Z108618\_0505 ( )  
PULPROG zgpg30  
TD 65536  
SOLVENT CDCl3  
NS 2000  
DS 4  
SWH 24038.461 Hz  
FIDRES 0.733596 Hz  
AQ 1.3631438 sec  
RG 199.6  
DW 20.800 usec  
DE 6.50 usec  
TE 299.0 K  
D1 2.00000000 sec  
TD1 0.03000000 sec  
TD0  
SFO1 100.6550186 MHz  
NUC1 13C  
P1 9.80 usec  
PLW1 58.00000000 W  
SF02 400.259010 MHz  
NUC2 1H  
CPDPRG2 waltz16  
PCPD2 80.00 usec  
PLW2 15.00000000 W  
PLW12 0.38716000 W  
PLW13 0.19474000 W

F2 - Processing parameters  
SI 32768  
SF 100.6449542 MHz  
WDW EM  
SSB 0  
LB 1.00 Hz  
GB 0  
PC 1.40

# <sup>19</sup>F NMR of RuL3PTA

Signature SIF VIT VELLORE  
6C

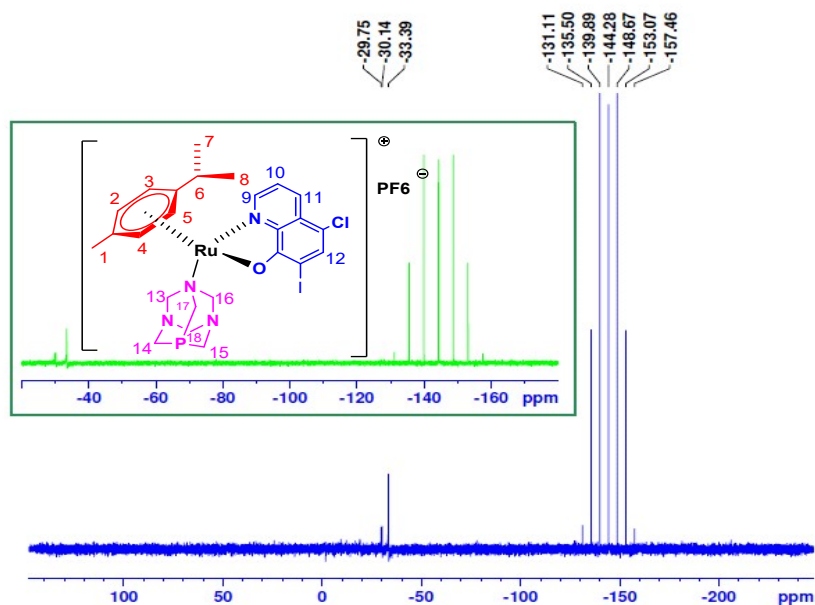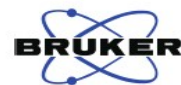

Current Data Parameters  
NAME Dr.PP270919  
EXPNO 54  
PROCNO 1

F2 - Acquisition Parameters  
Date\_ 20190928  
Time 6.31 h  
INSTRUM spect  
PROBHD Z108618\_0505 ( )  
PULPROG zg30  
TD 65536  
SOLVENT DMSO  
NS 32  
DS 4  
SWH 64102.563 Hz  
FIDRES 1.956255 Hz  
AQ 0.5111808 sec  
RG 199.6  
DW 7.800 usec  
DE 6.50 usec  
TE 298.2 K  
D1 2.0000000 sec  
TD0 1  
SFO1 162.0193069 MHz  
NUC1 31P  
P1 13.75 usec  
PLW1 15.0000000 W

F2 - Processing parameters  
SI 32768  
SF 162.0274083 MHz  
WDW EM  
SSB 0  
LB 1.00 Hz  
GB 0  
PC 1.40

# <sup>31</sup>P NMR of RuL3PTA

Signature SIF VIT VELLORE  
6C

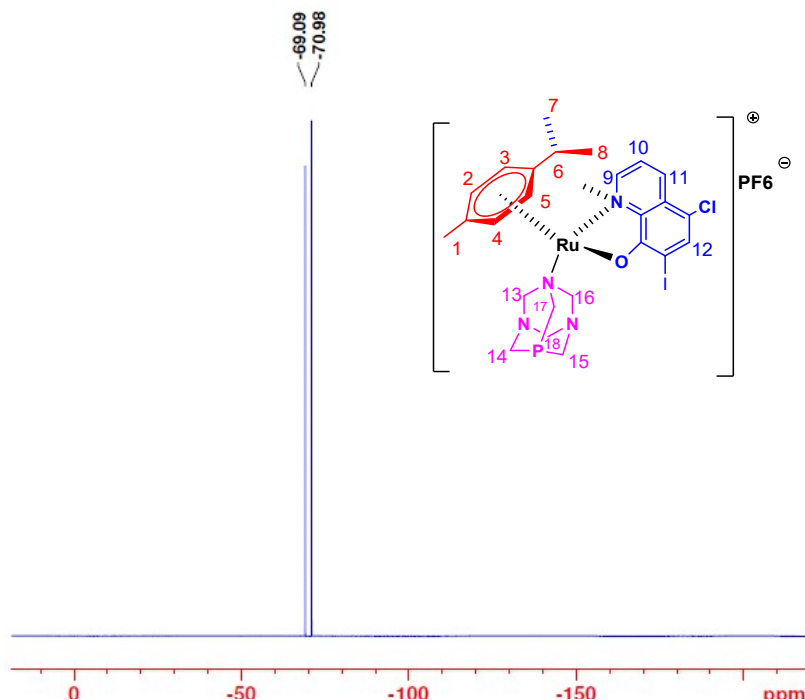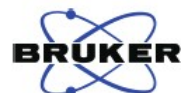

Current Data Parameters  
NAME Dr.PP270919  
EXPNO 55  
PROCNO 1

F2 - Acquisition Parameters  
Date\_ 20190928  
Time 6.34 h  
INSTRUM spect  
PROBHD Z108618\_0505 ( )  
PULPROG zgfgqn  
TD 131072  
SOLVENT DMSO  
NS 16  
DS 4  
SWH 89285.711 Hz  
FIDRES 1.362392 Hz  
AQ 0.7340032 sec  
RG 199.6  
DW 5.600 usec  
DE 6.50 usec  
TE 298.3 K  
D1 1.0000000 sec  
TD0 1  
SFO1 376.5811447 MHz  
NUC1 19F  
P1 14.75 usec  
PLW1 19.0000000 W

F2 - Processing parameters  
SI 65536  
SF 376.6188065 MHz  
WDW EM  
SSB 0  
LB 0.30 Hz  
GB 0  
PC 1.00

# <sup>1</sup>H NMR of RuL4PTA

Signature SIF VIT VELLORE  
6D

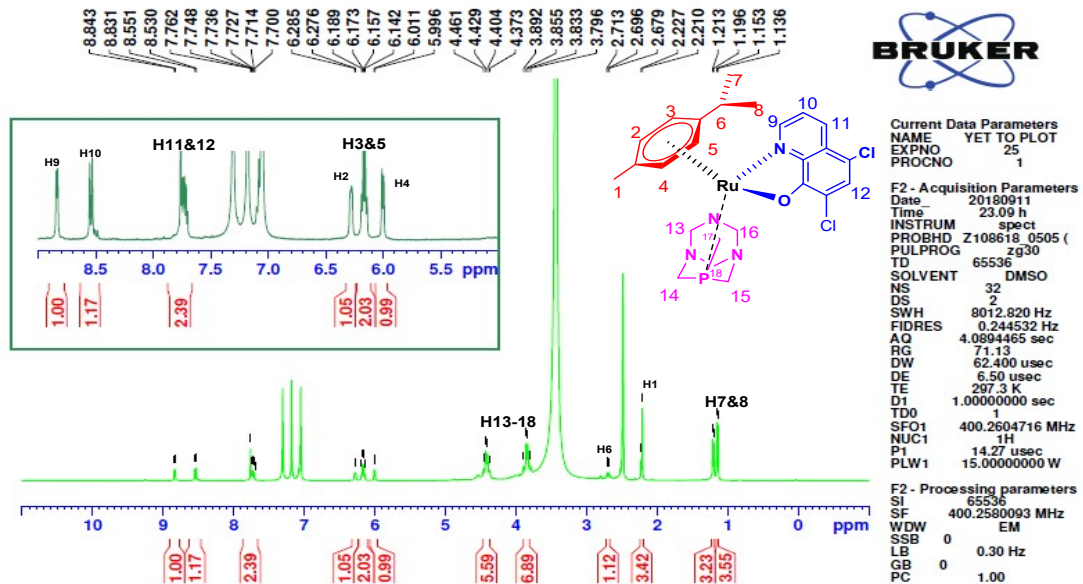

# <sup>19</sup>F NMR of RuL4PTA

Signature SIF VIT VELLORE  
6d

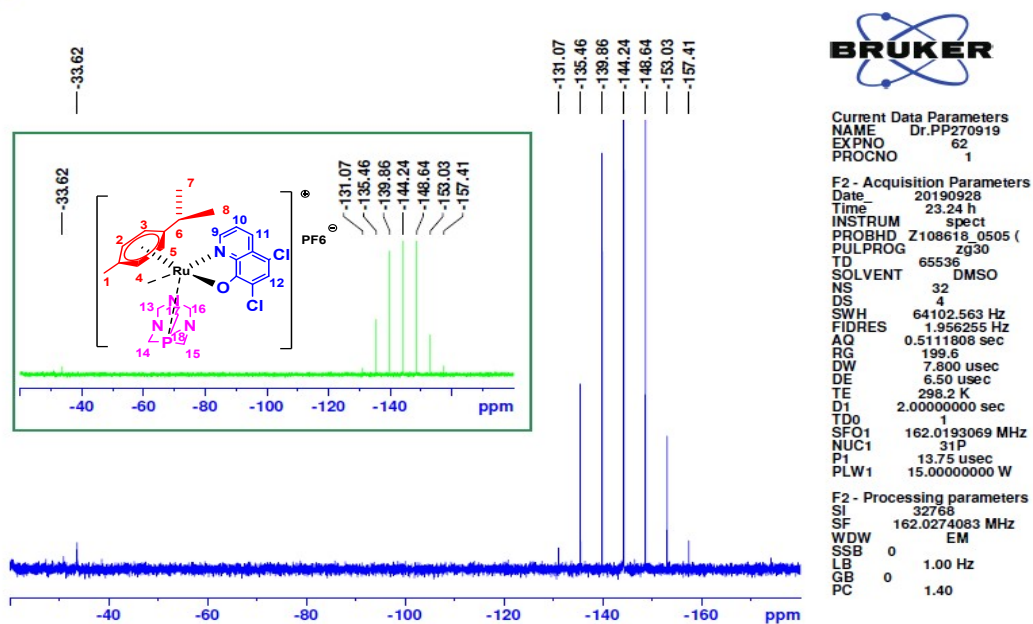

# <sup>31</sup>P NMR of RuL4PTA

Signature SIF VIT VELLORE  
6D

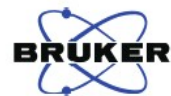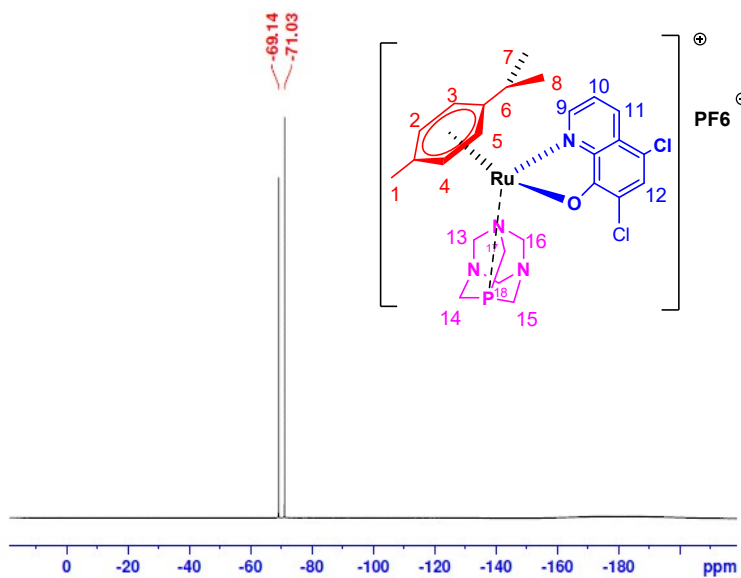

Current Data Parameter  
NAME YET TO PLO  
EXPNO 27  
PROCNO 1

F2 - Acquisition Param  
Date 20180911  
Time 23.14 h  
INSTRUM spect  
PROBHD Z108618\_05  
PULPROG zgpg30  
TD 131072  
SOLVENT DMSO  
NS 32  
DS 4  
SWH 89285.711 H  
FIDRES 1.362392 Hz  
AQ 0.7340032 sec  
RG 199.6  
DW 5.600 usec  
DE 6.50 usec  
TE 297.2 K  
D1 1.00000000 sec  
TD0 1  
SFO1 376.5811447 MHz  
NUC1 19F  
P1 14.75 usec  
PLW1 19.00000000

F2 - Processing param  
SI 65536  
SF 376.6188065 MHz  
WDW EM  
SSB 0  
LB 0.30 Hz  
GB 0  
PC 1.00

# <sup>1</sup>H NMR of RuL5PTA

Signature SIF VIT VELLORI  
6E

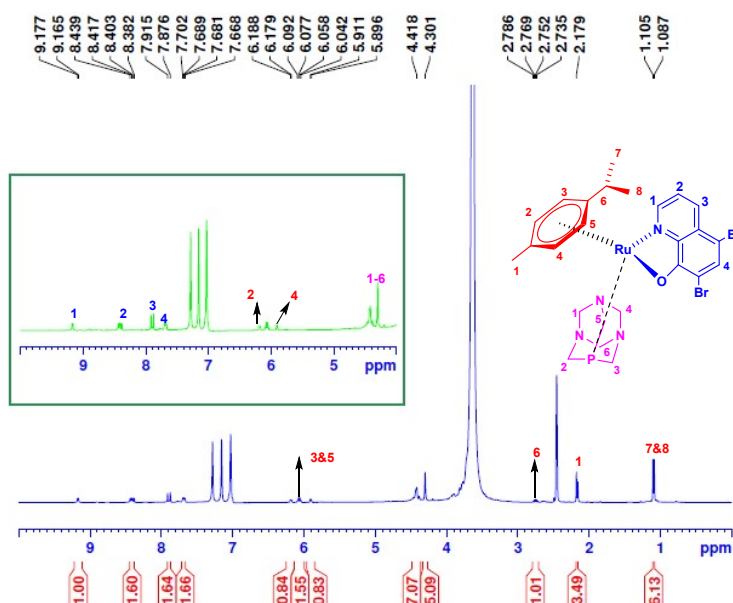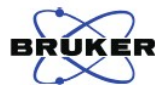

Current Data Parameters  
NAME Dr.PP270919  
EXPNO 46  
PROCNO 1

F2 - Acquisition Parameters  
Date\_ 20190928  
Time 1.33 h  
INSTRUM spect  
PROBHD Z108618\_0505 (  
PULPROG zg30  
TD 65536  
SOLVENT DMSO  
NS 64  
DS 2  
SWH 8012.820 Hz  
FIDRES 0.244532 Hz  
AQ 4.0894465 sec  
RG 35.49  
DW 62.400 usec  
DE 6.50 usec  
TE 298.0 K  
D1 1.00000000 sec  
TD0 1  
SFO1 400.2604716 MHz  
NUC1 1H  
P1 14.00 usec  
PLW1 16.00000000 W

F2 - Processing parameters  
SI 65536  
SF 400.2580214 MHz  
WDW EM  
SSB 0  
LB 0.30 Hz  
GB 0  
PC 1.00

# <sup>13</sup>C NMR of RuL5PTA

Signature SIF VIT VELLORI  
6E

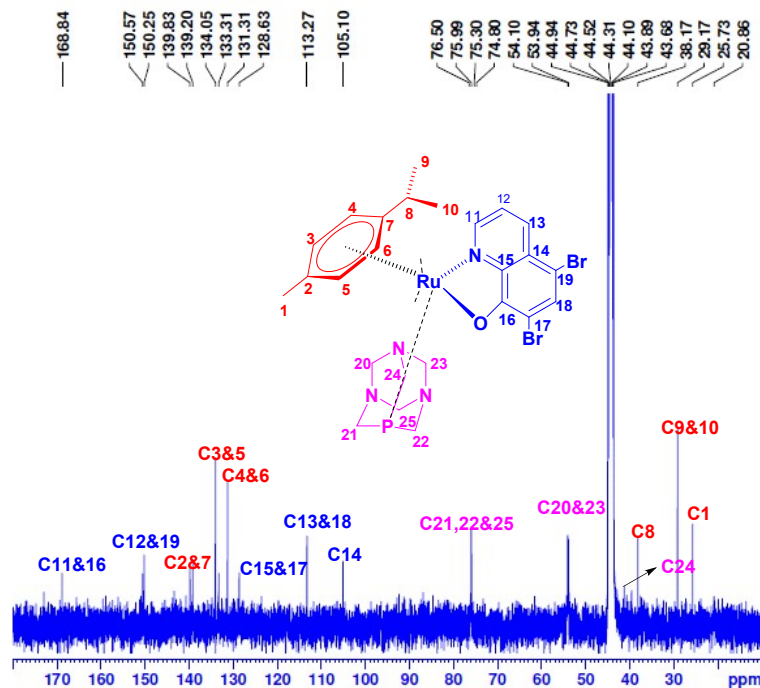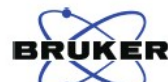

Current Data Parameters  
NAME NMR OF HQ PTA C13  
EXPNO 25  
PROCNO 1

F2 - Acquisition Parameters  
Date\_ 20191124  
Time 22.45 h  
INSTRUM spect  
PROBHD Z108618\_0505 (  
PULPROG zgpg30  
TD 65536  
SOLVENT CDCl3  
NS 2000  
DS 4  
SWH 24038.461 Hz  
FIDRES 0.733596 Hz  
AQ 1.3631488 sec  
RG 199.6  
DW 20.800 usec  
DE 6.50 usec  
TE 298.7 K  
D1 2.00000000 sec  
D11 0.03000000 sec  
TD0 1  
SFO1 100.6550186 MHz  
NUC1 13C  
P1 9.80 usec  
PLW1 58.00000000 W  
SFO2 400.2596010 MHz  
NUC2 1H  
CPDPRG2 waltz16  
PCPD2 90.00 usec  
PLW2 16.00000000 W  
PLW12 0.38716000 W  
PLW13 0.19474000 W

F2 - Processing parameters  
SI 32768  
SF 100.6449542 MHz  
WDW EM  
SSB 0  
LB 1.00 Hz  
GB 0  
PC 1.40

# <sup>19</sup>F NMR of RuL5PTA

Signature SIF VIT VELLORE  
6E

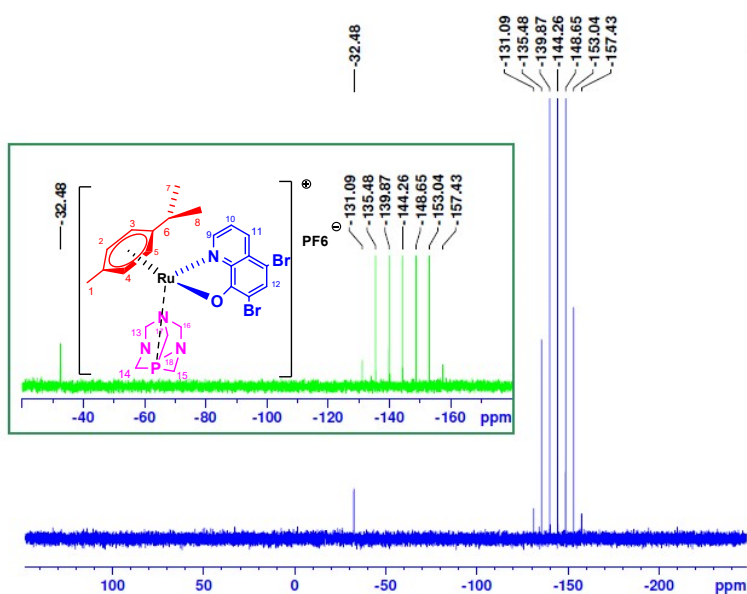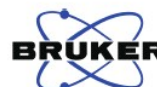

Current Data Parameter  
NAME Dr.PP270919  
EXPNO 50  
PROCNO 1

F2 - Acquisition Parame  
Date 20190928  
Time 2.11 h  
INSTRUM spect  
PROBHD Z108618\_050  
PULPROG zg30  
TD 65536  
SOLVENT DMSO  
NS 32  
DS 4  
SWH 64102.563 Hz  
FIDRES 1.956255 Hz  
AQ 0.5111808 sec  
RG 199.6  
DW 7.600 usec  
DE 6.50 usec  
TE 298.1 K  
D1 2.0000000 sec  
D0  
SFO1 162.0193069 MHz  
NUC1 19F  
P1 13.75 usec  
PLW1 15.0000000 W

F2 - Processing parame  
SI 32768  
SF 162.0274083 MHz  
WDW EM  
SSB 0  
LB 1.00 Hz  
GB 0  
PC 1.40

# <sup>31</sup>P NMR of RuL5PTA

Signature SIF VIT VELLORE  
6E

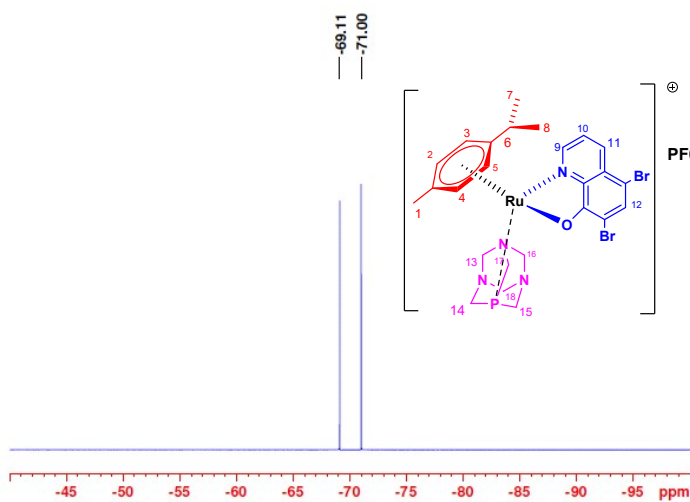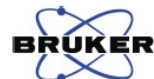

Current Data Parameters  
NAME Dr.PP270919  
EXPNO 51  
PROCNO 1

F2 - Acquisition Parameters  
Date\_ 20190928  
Time 2.17 h  
INSTRUM spect  
PROBHD Z108618\_0505 ( )  
PULPROG zgflqn  
TD 131072  
SOLVENT DMSO  
NS 16  
DS 4  
SWH 89285.711 Hz  
FIDRES 1.362392 Hz  
AQ 0.7340032 sec  
RG 199.6  
DW 5.600 usec  
DE 6.50 usec  
TE 298.0 K  
D1 1.00000000 sec  
D0  
SFO1 376.5811447 MHz  
NUC1 19F  
P1 14.75 usec  
PLW1 19.00000000 W

F2 - Processing parameters  
SI 65536  
SF 376.6188065 MHz  
WDW EM  
SSB 0  
LB 0.30 Hz  
GB 0  
PC 1.00



# FT-IR Spectra

## RuL1PTA

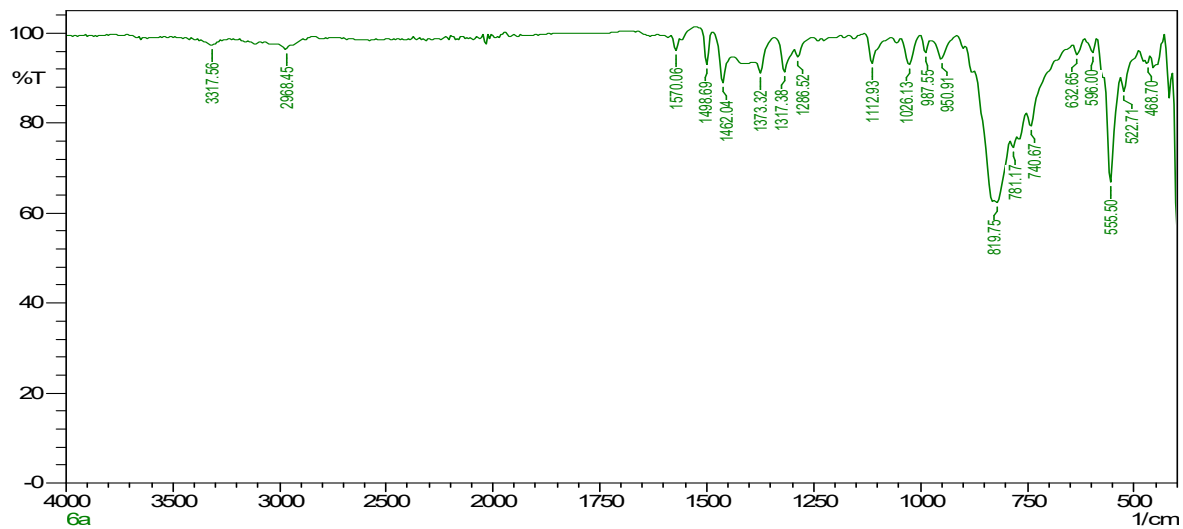

## RuL2PTA

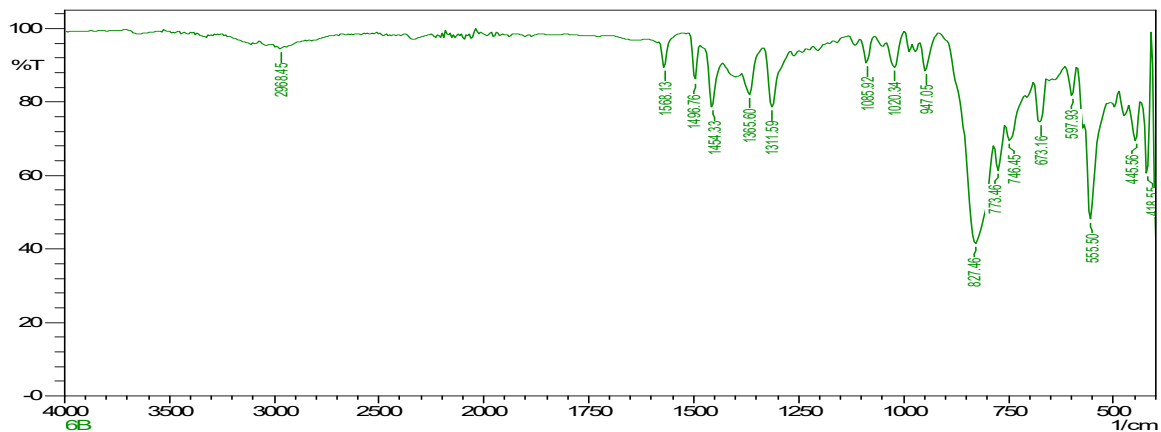

## RuL3PTA

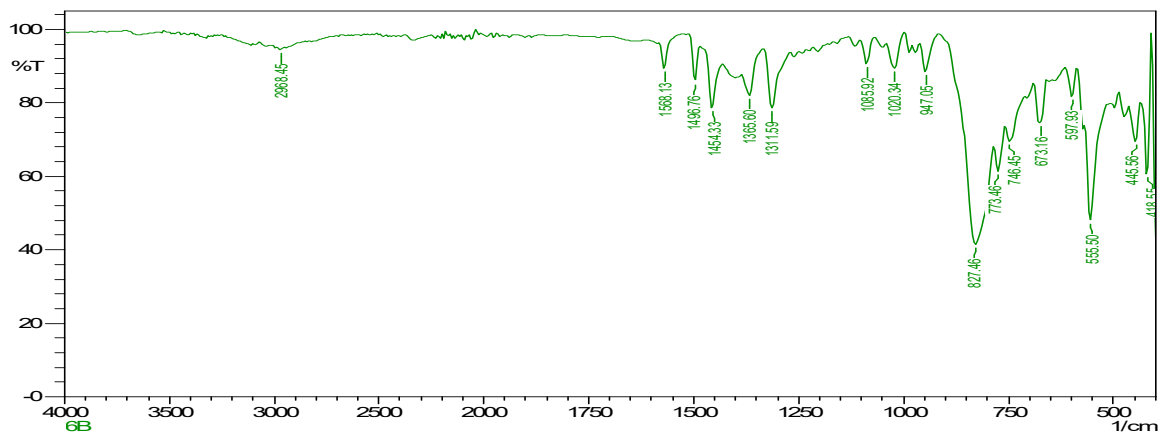

## RuL4PTA

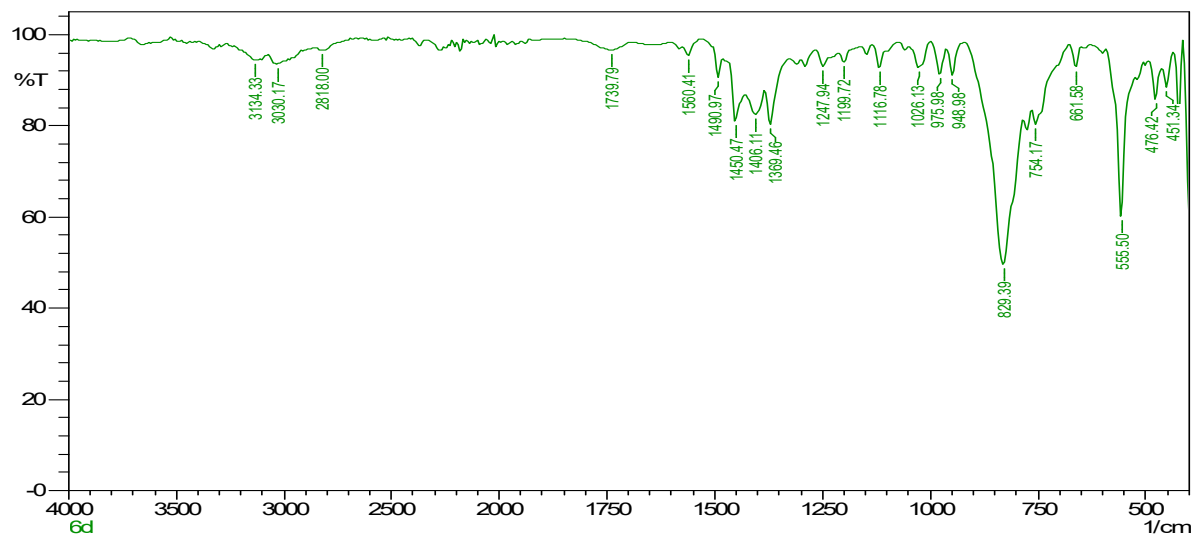

## RuL5PTA

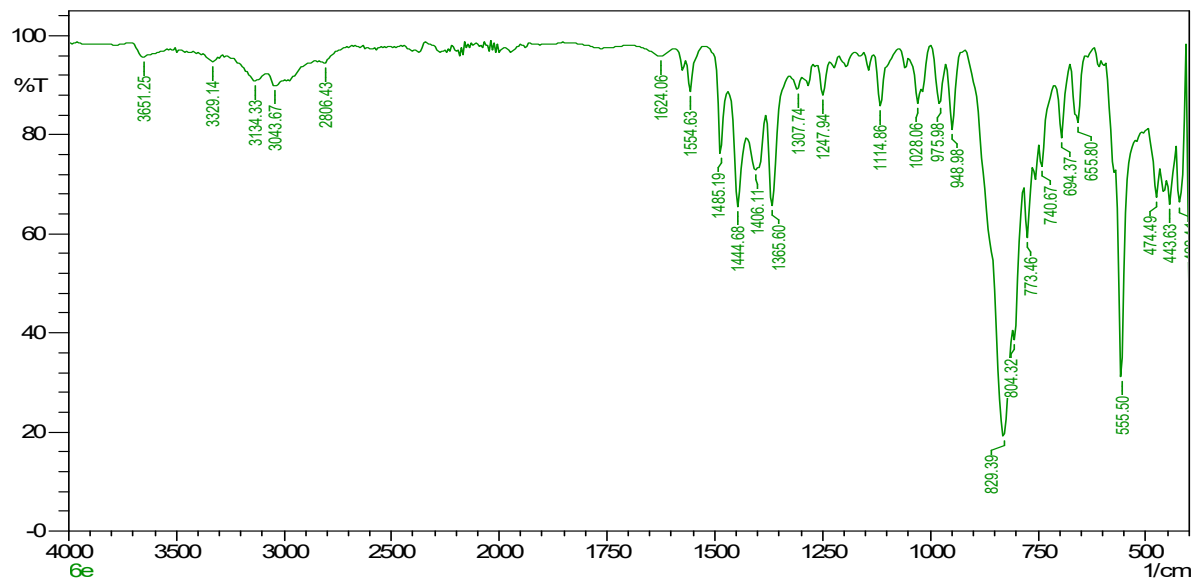

## Purity (UPLC of RuL4PTA)

### Auto-Scaled Chromatogram

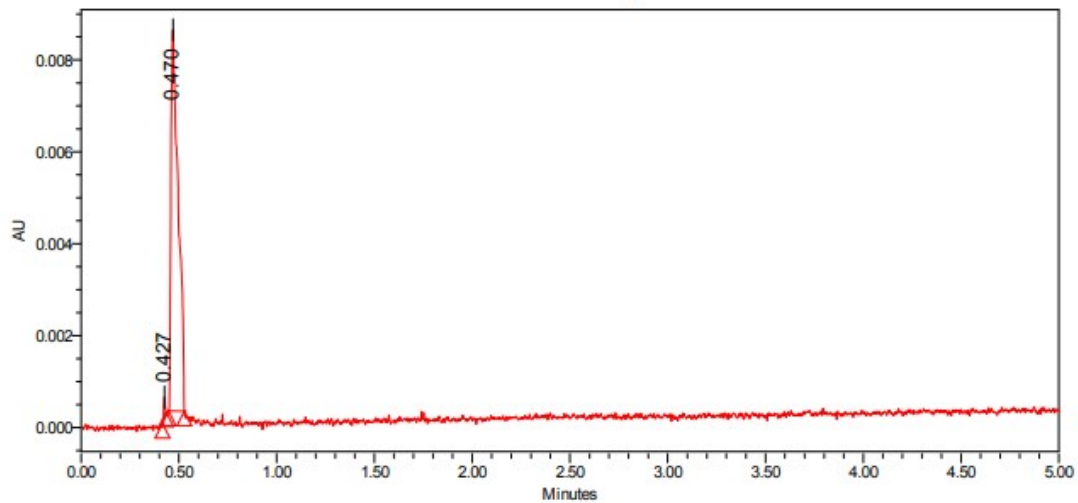

#### Peak Results

| Name | RT    | Area  | % Area |
|------|-------|-------|--------|
| 1    | 0.427 | 215   | 1.00   |
| 2    | 0.470 | 21162 | 99.00  |

# ESI-MS (HRMS) :

## RuL1PTA

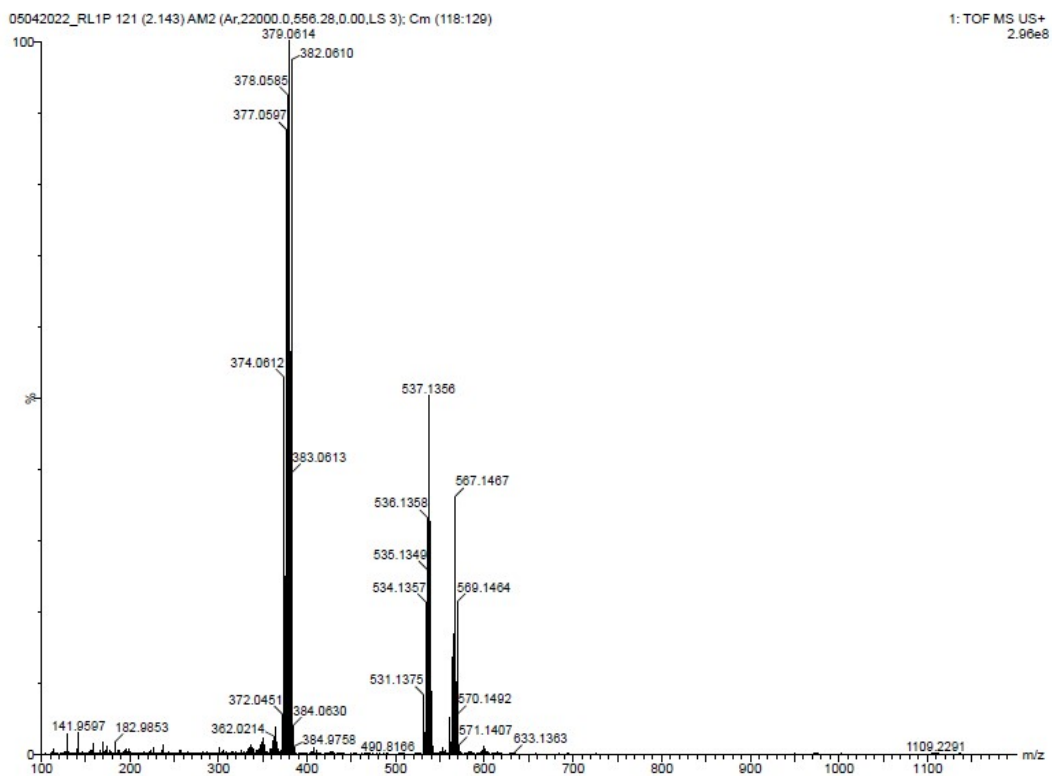

**Isotopic distribution**

**Error = 0.0000186 % (0.186 ppm)**

05042022\_RL1P 121 (2.143) AM2 (Ar,22000.0,556.28,0.00,LS 3); Cm (119:130)

1: TOF MS US+  
1.53e8

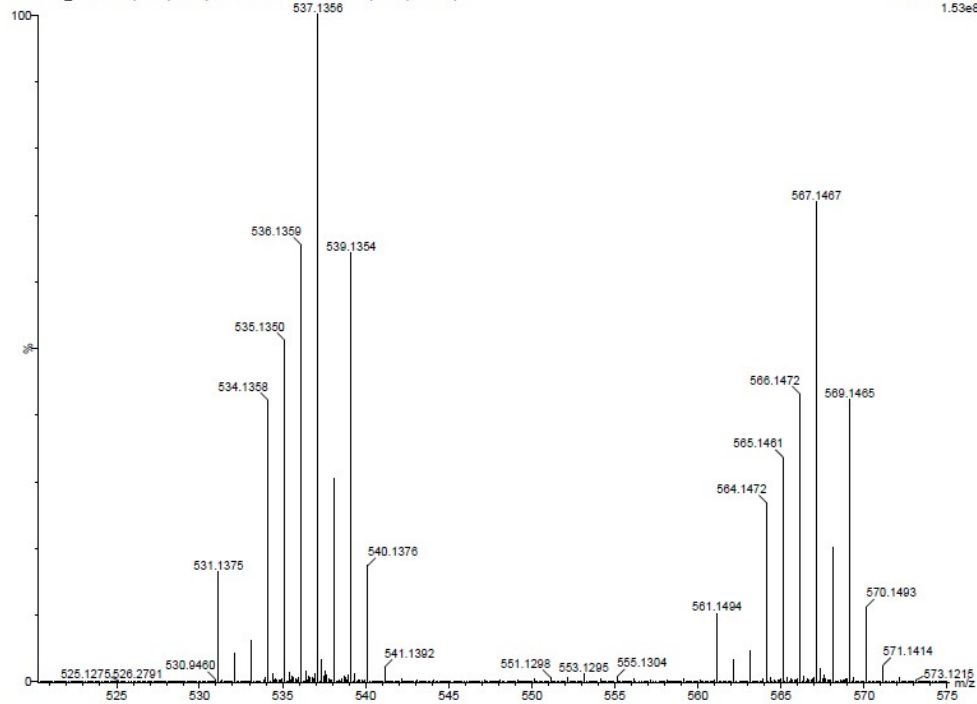

## RuL2PTA

11042022\_RL2P 133 (2.346) Cm (130:137)

1: TOF MS US+  
6.42e7

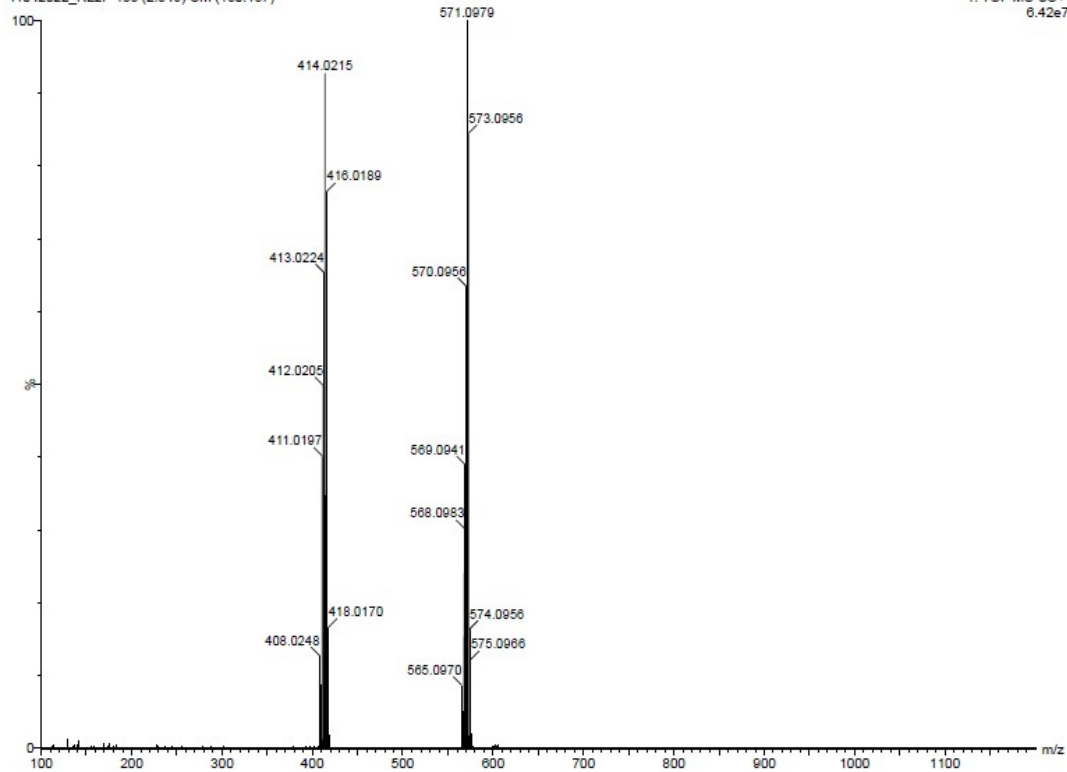

## Isotopic distribution

Error = 0.00019 % (1.926 ppm)

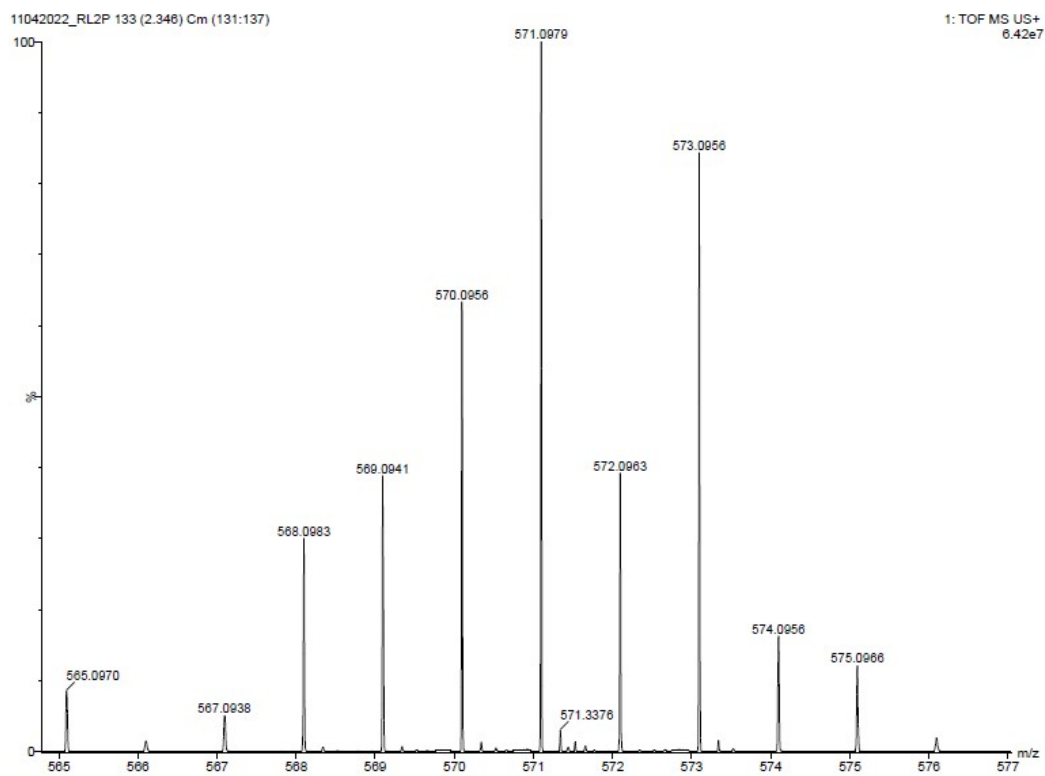

**RuL3PTA**

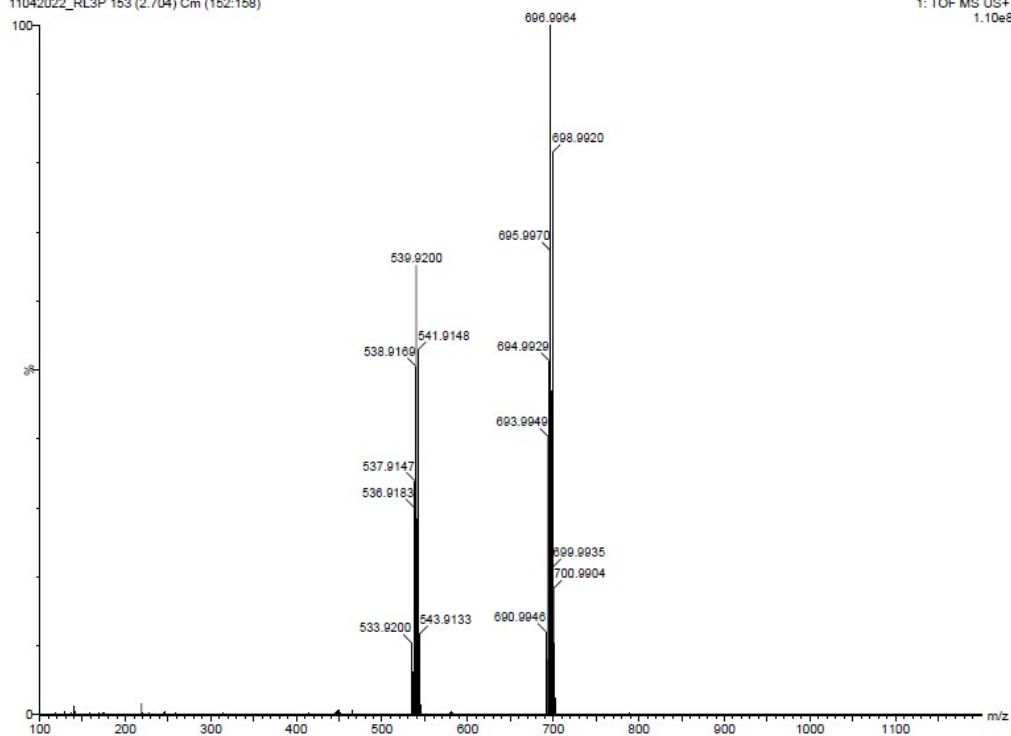

## Isotopic distribution

Error = 0.00043 % (4.30 ppm)

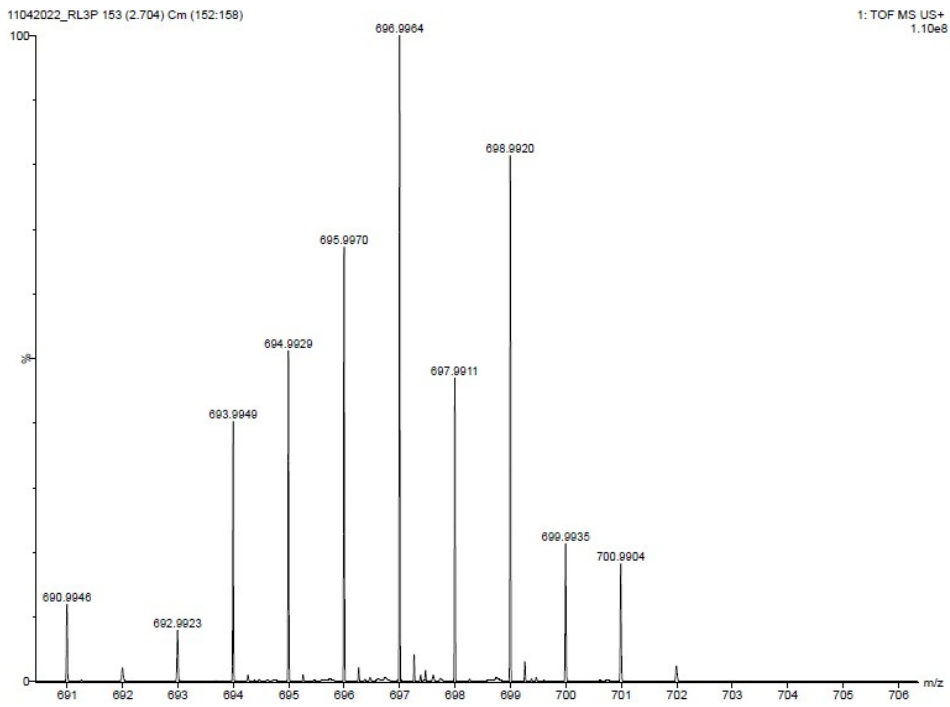

## RuL4PTA

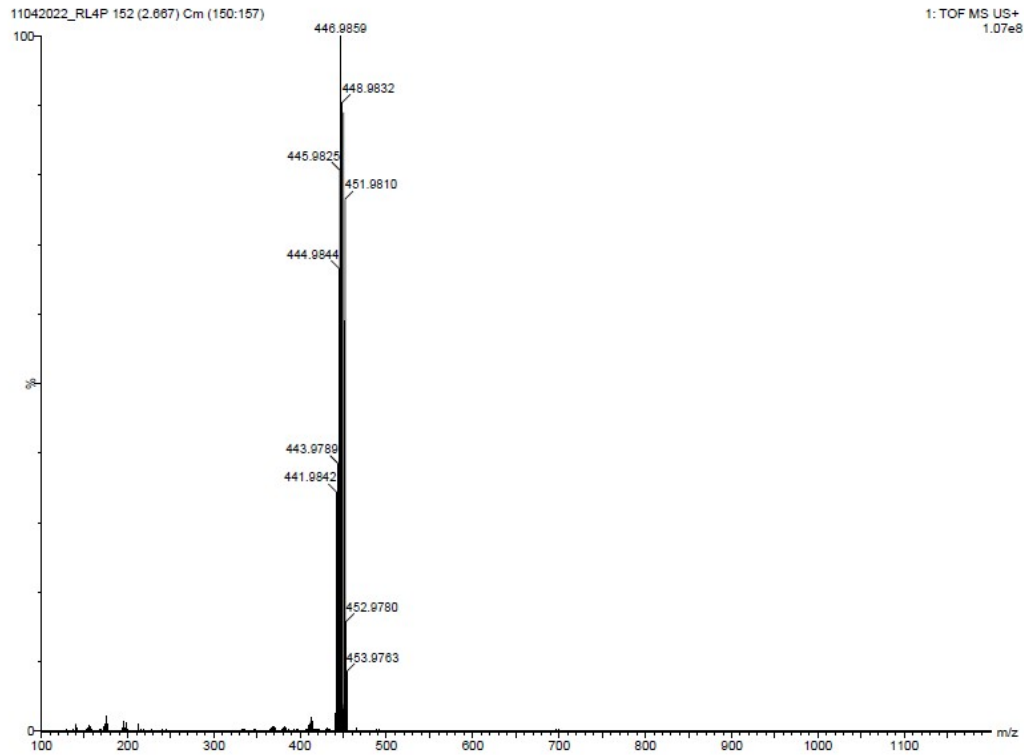



## Isotopic distribution

Error = 0.00286 % (28.6 ppm)

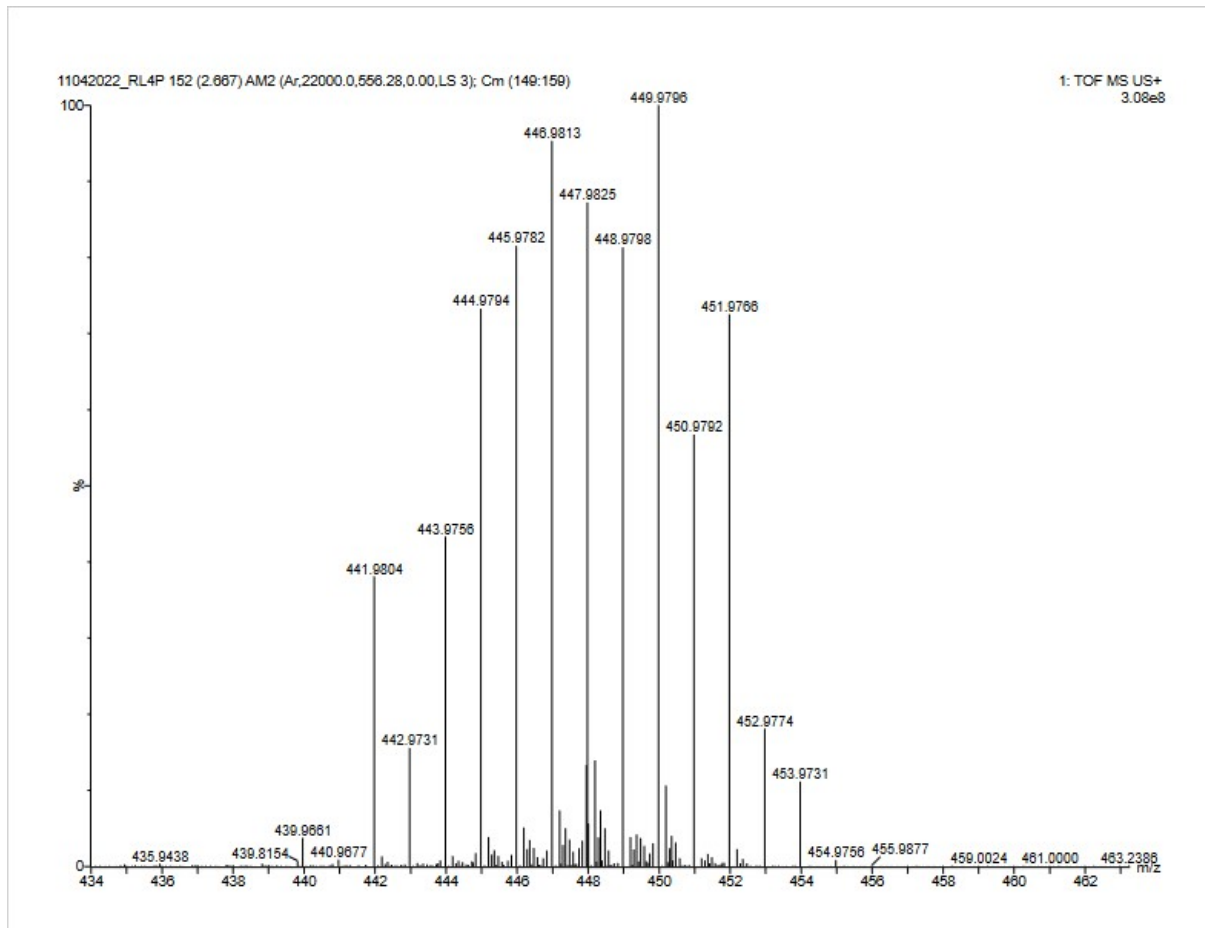

# RuL5PTA

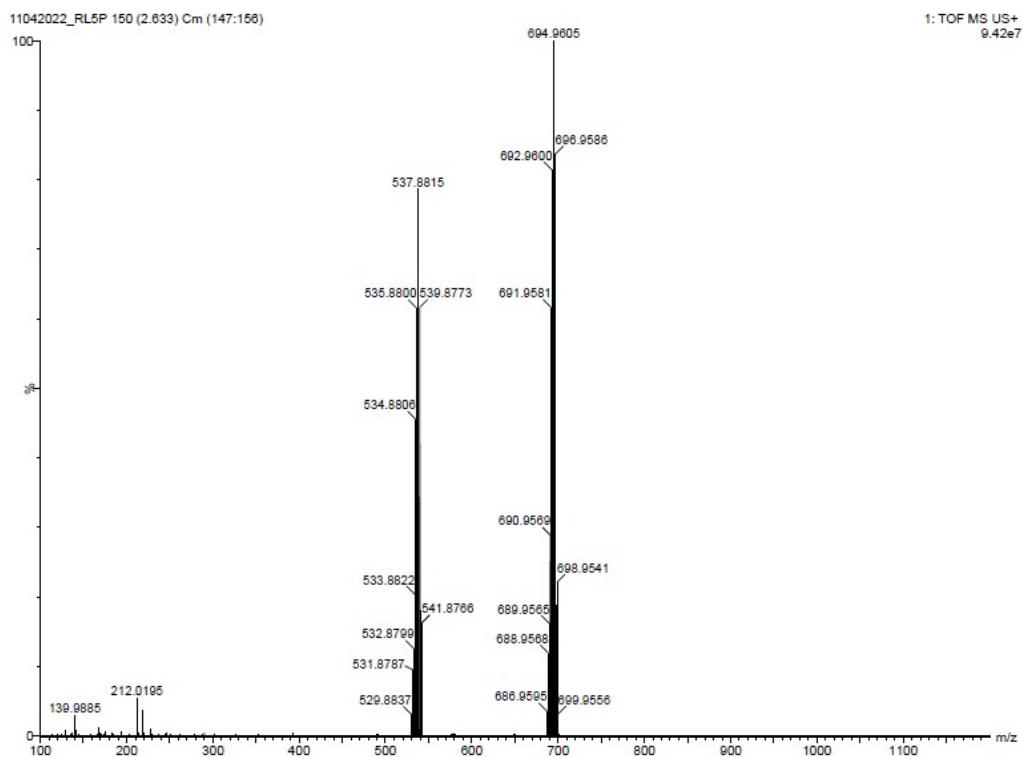

**Isotopic distribution**

**Error = 0.000834 % (8.34 ppm)**

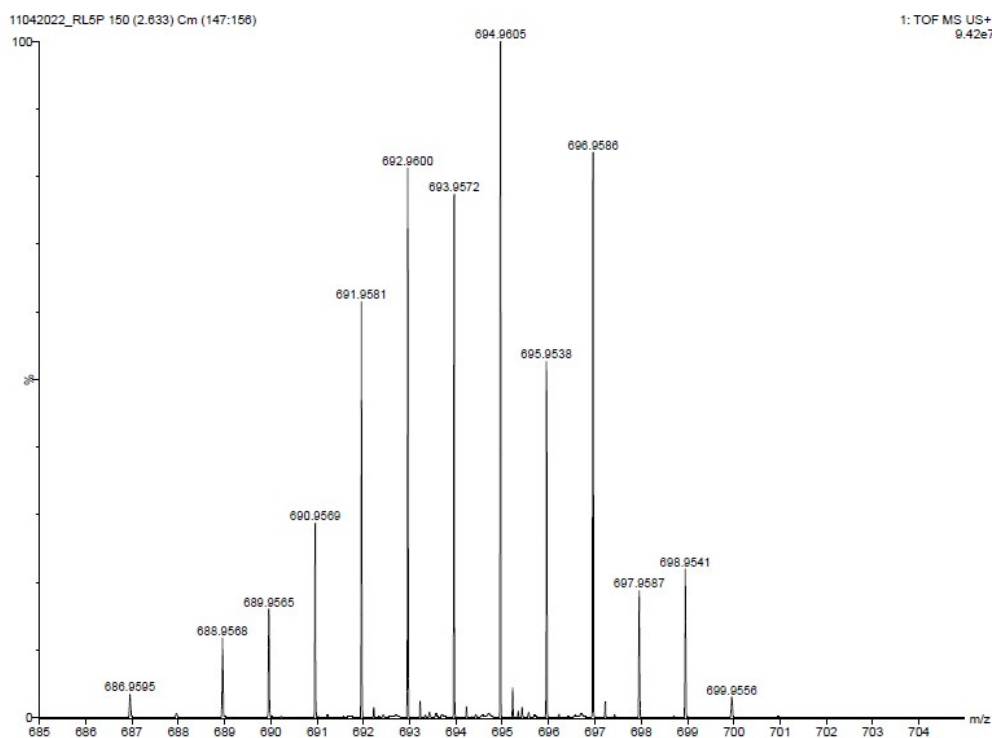

## Experimental Section

### Stability study

The stability of the RAPTA complex, **[RuL4PTA]** were performed in aqueous DMSO (H<sub>2</sub>O: DMSO = 9:1), GSH (1mM) medium.

### DNA binding study

Electronic absorption spectroscopy was employed to study the binding capacity of the complexes with calf-thymus DNA (Ct-DNA) and competitive binding assay as studied using ethidium bromide (EtBr) as quencher by fluorescence spectroscopy.

### UV–visible studies<sup>1</sup>

DNA binding assay was carried out by using complexes **[RuL3PTA]** and **[RuL4PTA]** in Tris-HCl buffer (5 mM Tris-HCl in water, pH 7.4) in aqueous medium. The concentration of Ct-DNA was calculated from its absorbance intensity at 260 nm and its known molar absorption coefficient value of 6600 M<sup>-1</sup> cm<sup>-1</sup>. Equal amount of DNA was added in both the

sample and reference in cuvettes. Titration was carried out by increasing concentration of CT-DNA. On the eve of each measurement, sample was equilibrated with CT-DNA for about 5 min and then absorbance of the complex was measured. The intrinsic DNA binding constant ( $K_b$ ) was calculated using the equation (i):

$$\frac{[DNA]}{(\epsilon_a - \epsilon_f)} = \frac{[DNA]}{(\epsilon_b - \epsilon_f)} + \frac{1}{K_b(\epsilon_a - \epsilon_f)}L \quad (i)$$

Where  $[DNA]$  is the concentration of DNA in the base pairs,  $\epsilon_a$  is the apparent extinction coefficient observed for the complex,  $\epsilon_f$  corresponds to the extinction coefficient of the complex in its free form, and  $\epsilon_b$  refers to the extinction coefficient of the complex when fully bound to DNA. The resultant data were plotted using Origin Lab, version 8.5 to obtain the  $[DNA]/(\epsilon_a - \epsilon_f)$  vs.  $[DNA]$  linear plot. The ratio of the slope to intercept from the linear fit gave the values of the intrinsic binding constants ( $K_b$ ).

### UV and Fluorescence study

UV and Fluorescence study of all these RAPTA complexes were executed in 10 % DMSO solution. Then the fluorescence quantum yields ( $\Phi$ ) were calculated by applying the comparative William's method which involves the use of well-characterized standard with known quantum yield value using 10% DMSO solution.<sup>2</sup> Quinine sulphate was used as a standard. Quantum yield was calculated according to the equation (ii):

$$\phi = \phi_R \times \frac{I_S}{I_R} \times \frac{OD_R}{OD_S} \times \frac{\eta_S}{\eta_R} \dots \dots (ii)$$

Where,  $\phi$  = quantum yield,  $I$  = peak area,  $OD$  = absorbance at  $\lambda_{max}$ ,  $\eta$  = refractive index of solvent (s) and reference (R). Here, we have used quinine sulphate as a standard for calculating the quantum yield.

### Ethidium bromide displacement assay

The ethidium bromide (EtBr) displacement assay was conducted to illustrate the mode of binding between the potent compounds with DNA.<sup>3</sup> The apparent binding constant ( $K_{app}$ ) of the complexes **[RuL3PTA]** and **[RuL4PTA]** to Ct-DNA were calculated using ethidium bromide (EtBr) as a spectral probe in 5 mM Tris-HCl buffer (pH 7.4). EtBr do not show any fluorescence in its free state as its fluorescence is quenched by the solvent molecules. Nevertheless, its fluorescence intensity was radially increases with increase the concentration

of Ct-DNA, which suggested the intercalative mode of binding of EtBr with DNA grooves. The fluorescence intensity was found to decrease with further increase in concentration of the complexes. According to the displacement theory, it can be said that the complexes displaced EtBr from CT-DNA grooves and then bound to the DNA base pairs. The values of the apparent binding constant ( $K_{app}$ ) were obtained by using the equation (iii):

$$K_{app} \times [Complex]_{50} = k_{EtBr} \times [EtBr] \dots \dots \dots (iii)$$

Where  $K_{EtBr}$  is the EtBr binding constant ( $K_{EtBr} = 1.0 \times 10^7 \text{ M}^{-1}$ ), and  $[EtBr] = 8 \times 10^{-6} \text{ M}$ . Stern-Volmer equation was followed for quantitative determination of the Stern-Volmer quenching constant ( $K_{SV}$ ).<sup>4</sup> Origin (8.5) software was used to plot the fluorescence data to obtain linear plot of  $I_0/I$  vs. [complex]. The value of  $K_{SV}$  was calculated from the following equation.

$$I_0/I = 1 + K_{SV} [Q] \dots \dots \dots (iv)$$

Where  $I_0$  = fluorescence intensity in absence of complex and  $I$  = fluorescence intensities in presence of complex of concentration [Q].

### Protein binding studies

We are acquainted with the fact that serum albumin proteins are the main component. It is well known in blood plasma proteins and plays important roles in drug transport and metabolism, interaction of the drug with human serum albumin (HSA) was studied from tryptophan emission quenching experiment.<sup>5</sup> Tryptophan emission quenching experiment was performed to detect the interaction of the RAPTA complexes, [RuL3PTA] and [RuL4PTA] with protein HSA. Initially, HSA solution ( $2 \times 10^{-6} \text{ M}$ ) was prepared in Tris-HCl/NaCl buffer. The aqueous solutions of the complexes were subsequently added to HSA solution with gradual increase of their concentrations. After each addition, the solutions were shaken slowly for 5 min before recording the fluorescence at a wavelength of 295 nm ( $\lambda_{ex} = 295 \text{ nm}$ ). A gradual decrease in fluorescence intensity of HSA at  $\lambda = 340 \text{ nm}$  was observed upon increasing the concentration of complex, which confirmed that the interaction between the complex and HSA was happened. Stern-Volmer equation was employed to quantitatively determine the quenching constant ( $K_{HSA}$ ). Origin Lab, version 8.5 was used to plot the emission spectral data to obtain linear plot of  $I_0/I$  vs. [complex] using the equation (v) given below:

$$I_0/I = 1 + K_{BSA} [Q] = 1 + k_q \tau_0 [Q] \quad (v)$$

Where  $I_0$  is the fluorescence intensity of HSA in absence of complex and  $I$  indicates the fluorescence intensity of HSA in presence of complex of concentration  $[Q]$ ,  $\tau_0$  = lifetime of the tryptophan in HSA found as  $1 \times 10^{-8}$  and  $k_q$  is the quenching constant. Scatchard equation (vi) gives the binding properties of the complexes.<sup>6</sup> Where  $K$  = binding constant and  $n$  = number of binding sites.

$$\log(I_0 - I/I) = \log K + n \log [Q] \quad (vi)$$

### Conductivity measurement<sup>7</sup>

For authenticating the interaction of the complexes with DMSO and aqueous DMSO, conductivity of the prepared complexes were performed using conductivity-TDS meter-307 (Systronics, India) and cell constant  $1.0 \text{ cm}^{-1}$ . Rate of conductivity was also estimated in different pH medium. Time dependent conductivity measurement was also carried out.

### n-Octanol–water partition coefficient ( $\log P_{o/w}$ )<sup>8</sup>

The  $\log P_{o/w}$  of the iridium complexes were adhering to shake flask method using the previously published procedure. A known amount of each RAPTA complexes was suspended in water (pre-saturated with n-octanol) and shaken for 48 h on an orbital shaker. To allow the phase separation, the solution was centrifuged for 10 min at 3000 rpm. To obtain the partition coefficient, different ratios (0.5: 1, 1: 1, and 2: 1) of the saturated solutions were shaken with pre-saturated n-octanol for 20 min on an orbital shaker and followed the same procedure. Aliquots of the aqueous and octanol layers were pipetted out separately and the absorbances were measured with UV-Vis spectrophotometer using proper dilution. Each set was performed in triplicate, concentration of the substances in each layer was calculated using the respective molar extinction coefficients and the partition coefficient ( $\log P_{o/w}$ ) values were obtained from the ratio.

### Notes and References

1. M. Sirajuddin, S. Ali, A. Badshah, Drug–DNA interactions and their study by UV–Visible, fluorescence spectroscopies and cyclic voltammetry, *J. Photochem. Photobio. B.*, 2013, **124**, 1–19.
2. M. Shamsi-Sani, F. Hirini, SM. Abedini, M. Seddighi, Synthesis of benzimidazole and quinoxaline derivatives using reusable sulfonated rice husk ash (RHA-SO<sub>3</sub>H) as a green and efficient solid acid catalyst, *Res. Chem. Intermed.*, 2016, **42**, 1091–1099.

3. S. Dasari, A. K. Patra, Luminescent europium and terbium complexes of dipyridoquinoxaline and dipyridophenazine ligands as photosensitizing antennae: structures and biological perspectives, *Dalton Trans.*, 2015, **44**, 19844-19855.
4. J. Keizer, Nonlinear fluorescence quenching and the origin of positive curvature in Stern-Volmer plots, *J. Am. Chem. Soc.*, 1983, **105**, 1494–1498.
5. V. D. Suryawanshi, L. S. Walekar, A. H. Gore, P. V. Anbhule, G. B. Kolekar, Spectroscopic analysis on the binding interaction of biologically active pyrimidine derivative with bovine serum albumin, *J. Pharm. Anal.*, 2016, **6**, 56–63.
6. K. Jeyalakshmi, J. Haribabu, C. Balachandran, S. Swaminathan, N. S. P. Bhuvanesh, R. Karvembu, Coordination Behavior of N,N',N''-Trisubstituted Guanidine Ligands in Their Ru–Arene Complexes: Synthetic, DNA/Protein Binding, and Cytotoxic Studies, *Organometallics*, 2019, **38**, 753–770.
7. S. Nikolić, L. Rangasamy, N. Gligorijević, S. Arandelović, S. Radulović, G. Gasser, S. Grgurić-Šipka, Synthesis, characterization and biological evaluation of novel Ru(II)–arene complexes containing intercalating ligands, *J. Inorg. Biochem.* 2016, **160**, 156–165.
8. M. Kubanik, H. Holtkamp, T. Söhnel, S. M. F. Jamieson, C. G. Hartinger, Impact of the Halogen Substitution Pattern on the Biological Activity of Organoruthenium 8-Hydroxyquinoline Anticancer Agents, *Organometallics*, 2015, **34**, 5658–5668.
